# Supplementary material for: Association of anorexia/appetite loss with malnutrition and mortality in older populations: A systematic literature review
Source: PubMed Central journal article supplement — J Cachexia Sarcopenia Muscle. 2023 Feb 20;14(2):706–29. doi: 10.1002/jcsm.13186 (PMC10067499; doi:10.1002/jcsm.13186), 2023-02-20
Supplement: JCSM-14-706-s001.pdf [file JCSM-14-706-s001.pdf]

## SUPPLEMENTARY MATERIAL

**Table S1** Search strategy for (A) Embase, (B) Pubmed, and (C) Cochrane central register of controlled trials or of systematic reviews. Searches conducted on July 31, 2021

### (A) EMBASE

| STEP | Search String                                                                                                                                | Hits        |
|------|----------------------------------------------------------------------------------------------------------------------------------------------|-------------|
| 1    | appetite/                                                                                                                                    | 23438       |
| 2    | anorexia/                                                                                                                                    | 63739       |
| 3    | (appetite or anorexia).mp.                                                                                                                   | 159439      |
| 4    | or/1-3                                                                                                                                       | 159439      |
| 5    | geriatrics/                                                                                                                                  | 31284       |
| 6    | (elderly or older or geriatric or geriatrics or ageing or aging).ti,ab,kw.                                                                   | 1207616     |
| 7    | 5 or 6                                                                                                                                       | 1214328     |
| 8    | 4 and 7                                                                                                                                      | 8315        |
| 9    | (anorexia nervosa or obes* or overweight).ti,ab,kw.                                                                                          | 538308      |
| 10   | 8 not 9                                                                                                                                      | 7469        |
| 11   | (animal\$ not human\$).sh,hw.                                                                                                                | 4515249     |
| 12   | conference abstract.pt.                                                                                                                      | 4140712     |
| 13   | editorial or comment* or letter or note case study or case studies or case report* or erratum).pt. or (case stud* or case report*).ti,ab,kw. | 2778642     |
| 14   | or/11-13                                                                                                                                     | 11056730    |
| 15   | 10 not 14                                                                                                                                    | 5287        |
| 16   | limit 15 to English language                                                                                                                 | 4849        |
| 17   | limit 16 to yr="2011 -Current"                                                                                                               | 2871        |
| 18   | remove duplicates from 17                                                                                                                    | <b>2837</b> |

### (B) PUBMED

| STEP | Search String                                                                                                                                                                                                                                                                                                                                 | Hits    |
|------|-----------------------------------------------------------------------------------------------------------------------------------------------------------------------------------------------------------------------------------------------------------------------------------------------------------------------------------------------|---------|
| 1    | "appetite"[MeSH Terms]                                                                                                                                                                                                                                                                                                                        | 10,935  |
| 2    | "anorexia"[MeSH Terms]                                                                                                                                                                                                                                                                                                                        | 5,111   |
| 3    | "appetite"[MeSH Terms] OR "appetite"[All Fields] OR "appetites"[All Fields] OR "appetitive"[All Fields] OR "appetitively"[All Fields] OR "appetitiveness"[All Fields] OR "anorexia"[MeSH Terms] OR "anorexia"[All Fields] OR "anorexias"[All Fields]                                                                                          | 82,428  |
| 4    | "appetite"[MeSH Terms] OR "anorexia"[MeSH Terms] OR "appetite"[MeSH Terms] OR "appetite"[All Fields] OR "appetites"[All Fields] OR "appetitive"[All Fields] OR "appetitively"[All Fields] OR "appetitiveness"[All Fields] OR "anorexia"[MeSH Terms] OR "anorexia"[All Fields] OR "anorexias"[All Fields]                                      | 82,428  |
| 5    | "geriatrics"[MeSH Terms]                                                                                                                                                                                                                                                                                                                      | 30,586  |
| 6    | "geriatric"[Text Word] OR "older population"[Text Word] OR "elderly"[Text Word] OR "ageing"[Text Word] OR "aging"[Text Word]                                                                                                                                                                                                                  | 673,320 |
| 7    | "geriatrics"[MeSH Terms] OR "geriatric"[Text Word] OR "older population"[Text Word] OR "elderly"[Text Word] OR "ageing"[Text Word] OR "aging"[Text Word]                                                                                                                                                                                      | 691,578 |
| 8    | ("appetite"[MeSH Terms] OR "anorexia"[MeSH Terms] OR ("appetite"[MeSH Terms] OR "appetite"[All Fields] OR "appetites"[All Fields] OR "appetitive"[All Fields] OR "appetitively"[All Fields] OR "appetitiveness"[All Fields] OR "anorexia"[MeSH Terms] OR "anorexia"[All Fields] OR "anorexias"[All Fields])) AND ("geriatrics"[MeSH Terms] OR | 2,526   |

|    |                                                                                                                                                                                                                                                                                                                                                                                                                                                                                                                                                                                                                                                                                                                                                                                                                                                                                                                                                                                                                                                                                                                                                                                                                                                                                                                                                                                                                                                                      |           |
|----|----------------------------------------------------------------------------------------------------------------------------------------------------------------------------------------------------------------------------------------------------------------------------------------------------------------------------------------------------------------------------------------------------------------------------------------------------------------------------------------------------------------------------------------------------------------------------------------------------------------------------------------------------------------------------------------------------------------------------------------------------------------------------------------------------------------------------------------------------------------------------------------------------------------------------------------------------------------------------------------------------------------------------------------------------------------------------------------------------------------------------------------------------------------------------------------------------------------------------------------------------------------------------------------------------------------------------------------------------------------------------------------------------------------------------------------------------------------------|-----------|
| 9  | ("geriatric"[Text Word] OR "older population"[Text Word] OR "elderly"[Text Word] OR "ageing"[Text Word] OR "aging"[Text Word])<br>("Animals"[MeSH Terms] NOT ("Animals"[MeSH Terms] AND "Humans"[MeSH Terms])) OR ("animal*"[Title/Abstract] OR "in vitro"[Title/Abstract] OR "tissue*"[Title/Abstract] OR "murine"[Title/Abstract] OR "mouse"[Title/Abstract] OR "mice"[Title/Abstract] OR "swine*"[Title/Abstract] OR "pig"[Title/Abstract] OR "pigs"[Title/Abstract] OR "porcine"[Title/Abstract] OR "rat"[Title/Abstract] OR "rats"[Title/Abstract] OR "rodent*"[Title/Abstract] OR "monkey"[Title/Abstract] OR "monkeys"[Title/Abstract] OR "ape"[Title/Abstract] OR "apes"[Title/Abstract] OR "dog"[Title/Abstract] OR "dogs"[Title/Abstract] OR "canine*"[Title/Abstract] OR "cat"[Title/Abstract] OR "cats"[Title/Abstract] OR "feline*"[Title/Abstract] OR "cow"[Title/Abstract] OR "bovine"[Title/Abstract] OR "horse"[Title/Abstract] OR "equine"[Title/Abstract])                                                                                                                                                                                                                                                                                                                                                                                                                                                                                        | 7,951,611 |
| 10 | (("appetite"[MeSH Terms] OR "anorexia"[MeSH Terms] OR ("appetite"[MeSH Terms] OR "appetite"[All Fields] OR "appetites"[All Fields] OR "appetitive"[All Fields] OR "appetitively"[All Fields] OR "appetitiveness"[All Fields] OR "anorexia"[MeSH Terms] OR "anorexia"[All Fields] OR "anorexias"[All Fields])) AND ("geriatrics"[MeSH Terms] OR "geriatric"[Text Word] OR "older population"[Text Word] OR "elderly"[Text Word] OR "ageing"[Text Word] OR "aging"[Text Word])) NOT (("Animals"[MeSH Terms] NOT ("Animals"[MeSH Terms] AND "Humans"[MeSH Terms])) OR ("animal*"[Title/Abstract] OR "in vitro"[Title/Abstract] OR "tissue*"[Title/Abstract] OR "murine"[Title/Abstract] OR "mouse"[Title/Abstract] OR "mice"[Title/Abstract] OR "swine*"[Title/Abstract] OR "pig"[Title/Abstract] OR "pigs"[Title/Abstract] OR "porcine"[Title/Abstract] OR "rat"[Title/Abstract] OR "rats"[Title/Abstract] OR "rodent*"[Title/Abstract] OR "monkey"[Title/Abstract] OR "monkeys"[Title/Abstract] OR "ape"[Title/Abstract] OR "apes"[Title/Abstract] OR "dog"[Title/Abstract] OR "dogs"[Title/Abstract] OR "canine*"[Title/Abstract] OR "cat"[Title/Abstract] OR "cats"[Title/Abstract] OR "feline*"[Title/Abstract] OR "cow"[Title/Abstract] OR "bovine"[Title/Abstract] OR "horse"[Title/Abstract] OR "equine"[Title/Abstract]))                                                                                                                                      | 1,923     |
| 11 | "editorial"[Publication Type] OR "comment"[Publication Type] OR "letter"[Publication Type] OR "case reports"[Publication Type]                                                                                                                                                                                                                                                                                                                                                                                                                                                                                                                                                                                                                                                                                                                                                                                                                                                                                                                                                                                                                                                                                                                                                                                                                                                                                                                                       | 3,958,062 |
| 12 | (("appetite"[MeSH Terms] OR "anorexia"[MeSH Terms] OR ("appetite"[MeSH Terms] OR "appetite"[All Fields] OR "appetites"[All Fields] OR "appetitive"[All Fields] OR "appetitively"[All Fields] OR "appetitiveness"[All Fields] OR "anorexia"[MeSH Terms] OR "anorexia"[All Fields] OR "anorexias"[All Fields])) AND ("geriatrics"[MeSH Terms] OR "geriatric"[Text Word] OR "older population"[Text Word] OR "elderly"[Text Word] OR "ageing"[Text Word] OR "aging"[Text Word])) NOT (("Animals"[MeSH Terms] NOT ("Animals"[MeSH Terms] AND "Humans"[MeSH Terms])) OR ("animal*"[Title/Abstract] OR "in vitro"[Title/Abstract] OR "tissue*"[Title/Abstract] OR "murine"[Title/Abstract] OR "mouse"[Title/Abstract] OR "mice"[Title/Abstract] OR "swine*"[Title/Abstract] OR "pig"[Title/Abstract] OR "pigs"[Title/Abstract] OR "porcine"[Title/Abstract] OR "rat"[Title/Abstract] OR "rats"[Title/Abstract] OR "rodent*"[Title/Abstract] OR "monkey"[Title/Abstract] OR "monkeys"[Title/Abstract] OR "ape"[Title/Abstract] OR "apes"[Title/Abstract] OR "dog"[Title/Abstract] OR "dogs"[Title/Abstract] OR "canine*"[Title/Abstract] OR "cat"[Title/Abstract] OR "cats"[Title/Abstract] OR "feline*"[Title/Abstract] OR "cow"[Title/Abstract] OR "bovine"[Title/Abstract] OR "horse"[Title/Abstract] OR "equine"[Title/Abstract])) NOT ("editorial"[Publication Type] OR "comment"[Publication Type] OR "letter"[Publication Type] OR "case reports"[Publication Type]) | 1,664     |
| 13 | ((((("appetite"[MeSH Terms] OR "anorexia"[MeSH Terms] OR ("appetite"[MeSH Terms] OR "appetite"[All Fields] OR "appetites"[All Fields] OR "appetitive"[All Fields] OR "appetitively"[All Fields] OR "appetitiveness"[All Fields] OR "anorexia"[MeSH Terms] OR "anorexia"[All Fields] OR "anorexias"[All Fields])) AND ("geriatrics"[MeSH Terms] OR "geriatric"[Text Word] OR "older population"[Text Word] OR "elderly"[Text Word] OR "ageing"[Text Word] OR "aging"[Text Word])) NOT (("Animals"[MeSH Terms] NOT ("Animals"[MeSH Terms] AND "Humans"[MeSH Terms])) OR ("animal*"[Title/Abstract] OR "in vitro"[Title/Abstract] OR "tissue*"[Title/Abstract] OR "murine"[Title/Abstract] OR "mouse"[Title/Abstract] OR "mice"[Title/Abstract] OR "swine*"[Title/Abstract] OR "pig"[Title/Abstract] OR "pigs"[Title/Abstract] OR "porcine"[Title/Abstract] OR "rat"[Title/Abstract] OR "rats"[Title/Abstract] OR "rodent*"[Title/Abstract] OR "monkey"[Title/Abstract] OR "monkeys"[Title/Abstract] OR "ape"[Title/Abstract] OR "apes"[Title/Abstract] OR "dog"[Title/Abstract] OR "dogs"[Title/Abstract] OR "canine*"[Title/Abstract] OR                                                                                                                                                                                                                                                                                                                              | 1,485     |

|    |                                                                                                                                                                                                                                                                                                                                                                                                                                                                                                                                                                                                                                                                                                                                                                                                                                                                                                                                                                                                                                                                                                                                                                                                                                                                                                                                                                                                                                                                                                                      |     |
|----|----------------------------------------------------------------------------------------------------------------------------------------------------------------------------------------------------------------------------------------------------------------------------------------------------------------------------------------------------------------------------------------------------------------------------------------------------------------------------------------------------------------------------------------------------------------------------------------------------------------------------------------------------------------------------------------------------------------------------------------------------------------------------------------------------------------------------------------------------------------------------------------------------------------------------------------------------------------------------------------------------------------------------------------------------------------------------------------------------------------------------------------------------------------------------------------------------------------------------------------------------------------------------------------------------------------------------------------------------------------------------------------------------------------------------------------------------------------------------------------------------------------------|-----|
|    | "cat"[Title/Abstract] OR "cats"[Title/Abstract] OR "feline*"[Title/Abstract] OR "cow"[Title/Abstract] OR "bovine"[Title/Abstract] OR "horse"[Title/Abstract] OR "equine"[Title/Abstract])) NOT ("editorial"[Publication Type] OR "comment"[Publication Type] OR "letter"[Publication Type] OR "case reports"[Publication Type])) AND (English[Filter])                                                                                                                                                                                                                                                                                                                                                                                                                                                                                                                                                                                                                                                                                                                                                                                                                                                                                                                                                                                                                                                                                                                                                               |     |
| 14 | ((("appetite"[MeSH Terms] OR "anorexia"[MeSH Terms] OR ("appetite"[MeSH Terms] OR "appetite"[All Fields] OR "appetites"[All Fields] OR "appetitive"[All Fields] OR "appetitively"[All Fields] OR "appetitiveness"[All Fields] OR "anorexia"[MeSH Terms] OR "anorexia"[All Fields] OR "anorexias"[All Fields]))) AND ("geriatrics"[MeSH Terms] OR "geriatric"[Text Word] OR "older population"[Text Word] OR "elderly"[Text Word] OR "ageing"[Text Word] OR "aging"[Text Word])) NOT (("Animals"[MeSH Terms] NOT ("Animals"[MeSH Terms] AND "Humans"[MeSH Terms])) OR ("animal*"[Title/Abstract] OR "in vitro"[Title/Abstract] OR "tissue*"[Title/Abstract] OR "murine"[Title/Abstract] OR "mouse"[Title/Abstract] OR "mice"[Title/Abstract] OR "swine*"[Title/Abstract] OR "pig"[Title/Abstract] OR "pigs"[Title/Abstract] OR "porcine"[Title/Abstract] OR "rat"[Title/Abstract] OR "rats"[Title/Abstract] OR "rodent*"[Title/Abstract] OR "monkey"[Title/Abstract] OR "monkeys"[Title/Abstract] OR "ape"[Title/Abstract] OR "apes"[Title/Abstract] OR "dog"[Title/Abstract] OR "dogs"[Title/Abstract] OR "canine*"[Title/Abstract] OR "cat"[Title/Abstract] OR "cats"[Title/Abstract] OR "feline*"[Title/Abstract] OR "cow"[Title/Abstract] OR "bovine"[Title/Abstract] OR "horse"[Title/Abstract] OR "equine"[Title/Abstract])) NOT ("editorial"[Publication Type] OR "comment"[Publication Type] OR "letter"[Publication Type] OR "case reports"[Publication Type])) AND (English[Filter]) AND (2011:2021[pdat])) | 762 |
|    | Total hits from line 14                                                                                                                                                                                                                                                                                                                                                                                                                                                                                                                                                                                                                                                                                                                                                                                                                                                                                                                                                                                                                                                                                                                                                                                                                                                                                                                                                                                                                                                                                              | 762 |

### (C) Cochrane Central Register of Controlled Trials; Cochrane Database of Systematic Reviews

| STEP | Search String                                                                                                                                 | Hits   |
|------|-----------------------------------------------------------------------------------------------------------------------------------------------|--------|
| 1    | appetite/                                                                                                                                     | 1256   |
| 2    | anorexia/                                                                                                                                     | 402    |
| 3    | (appetite or anorexia).mp.                                                                                                                    | 16744  |
| 4    | or/1-3                                                                                                                                        | 16744  |
| 5    | geriatrics/                                                                                                                                   | 208    |
| 6    | (elderly or older or geriatric or geriatrics or ageing or aging).ti,ab,kw.                                                                    | 112558 |
| 7    | 5 or 6                                                                                                                                        | 112578 |
| 8    | 4 and 7                                                                                                                                       | 1052   |
| 9    | (anorexia nervosa or obes* or overweight).ti,ab,kw.                                                                                           | 49834  |
| 10   | 8 not 9                                                                                                                                       | 952    |
| 11   | (animal\$ not human\$).sh,hw.                                                                                                                 | 2149   |
| 12   | conference abstract.pt.                                                                                                                       | 16875  |
| 13   | (editorial or comment* or letter or note case study or case studies or case report* or erratum).pt. or (case stud* or case report*).ti,ab,kw. | 26139  |
| 14   | or/11-13                                                                                                                                      | 44315  |
| 15   | 10 not 14                                                                                                                                     | 931    |
| 16   | limit 15 to English language [Limit not valid in CDSR; records were retained]                                                                 | 691    |
| 17   | limit 16 to yr="2011 -Current"                                                                                                                | 493    |
| 18   | remove duplicates from 17                                                                                                                     | 483    |

**Table S2** Analysis of risk of bias for (A) longitudinal cohort studies (Newcastle-Ottawa Scale) and for (B) longitudinal cross-sectional studies (modified Newcastle-Ottawa Scale) identified in the systematic literature review

**(A) Newcastle-Ottawa Scale for cohort studies<sup>13</sup>**

| Author, year                                 | Representativeness of the exposed cohort | Selection of the non-exposed cohort | Ascertainment of exposure | Demonstration that outcome of interest was not present at start of study | Comparability of cohorts on the basis of the design or analysis | Assessment of outcome | Was follow-up long enough for outcomes to occur? | Adequacy of follow-up of cohorts | Total |
|----------------------------------------------|------------------------------------------|-------------------------------------|---------------------------|--------------------------------------------------------------------------|-----------------------------------------------------------------|-----------------------|--------------------------------------------------|----------------------------------|-------|
| Cai et al., 2020 <sup>17</sup>               | 0                                        | 1                                   | 0                         | 1                                                                        | 2                                                               | 1                     | 1                                                | 1                                | 7     |
| Cox et al., 2021 <sup>35</sup>               | 1                                        | 1                                   | 1                         | 0                                                                        | 1                                                               | 1                     | 0                                                | 1                                | 6     |
| Cox et al., 2020 <sup>25</sup>               | 0                                        | 1                                   | 1                         | 1                                                                        | 2                                                               | 1                     | 1                                                | 1                                | 8     |
| De Almeida Mello et al., 2020 <sup>33</sup>  | 1                                        | 1                                   | 1                         | 1                                                                        | 2                                                               | 0                     | 1                                                | 1                                | 8     |
| Dent et al., 2015 <sup>43</sup>              | 0                                        | 1                                   | 1                         | 1                                                                        | 2                                                               | 1                     | 1                                                | 1                                | 8     |
| Engelheart et al., 2021 <sup>24</sup>        | 0                                        | 1                                   | 1                         | 1                                                                        | 1                                                               | 1                     | 1                                                | 0                                | 6     |
| Fournier et al., 2016 <sup>23</sup>          | 1                                        | 1                                   | 1                         | 1                                                                        | 2                                                               | 1                     | 1                                                | 1                                | 9     |
| Hippisley-Cox & Coupland, 2017 <sup>16</sup> | 1                                        | 1                                   | 1                         | 1                                                                        | 2                                                               | 1                     | 1                                                | 1                                | 9     |
| Hofer et al., 2018 <sup>27</sup>             | 0                                        | 1                                   | 1                         | 1                                                                        | 2                                                               | 1                     | 1                                                | 1                                | 8     |
| Hsu et al., 2019 <sup>38</sup>               | 1                                        | 1                                   | 1                         | 1                                                                        | 2                                                               | 0                     | 1                                                | 1                                | 8     |
| Huang et al., 2018 <sup>20</sup>             | 1                                        | 1                                   | 1                         | 1                                                                        | 2                                                               | 1                     | 1                                                | 1                                | 9     |
| Huang et al., 2014 <sup>19</sup>             | 1                                        | 1                                   | 1                         | 1                                                                        | 2                                                               | 1                     | 1                                                | 1                                | 9     |
| Kanamori et al., 2012 <sup>32</sup>          | 0                                        | 1                                   | 0                         | 1                                                                        | 2                                                               | 0                     | 1                                                | 1                                | 6     |
| Kirkhus et al., 2019 <sup>46</sup>           | 1                                        | 1                                   | 1                         | 0                                                                        | 2                                                               | 1                     | 1                                                | 1                                | 8     |
| Lambert et al., 2017 <sup>15</sup>           | 0                                        | 1                                   | 0                         | 0                                                                        | 2                                                               | 1                     | 0                                                | 0                                | 4     |
| Landi et al., 2012 <sup>18</sup>             | 1                                        | 1                                   | 1                         | 1                                                                        | 2                                                               | 1                     | 1                                                | 1                                | 9     |
| Landi et al., 2013 <sup>8</sup>              | 1                                        | 1                                   | 1                         | 0                                                                        | 2                                                               | 1                     | 1                                                | 1                                | 8     |
| Martinez-Reig et al., 2014 <sup>37</sup>     | 0                                        | 1                                   | 1                         | 0                                                                        | 2                                                               | 1                     | 1                                                | 1                                | 7     |
| Menldelson et al., 2018 <sup>44</sup>        | 0                                        | 1                                   | 1                         | 1                                                                        | 0                                                               | 1                     | 1                                                | 1                                | 6     |
| Mikami et al., 2019 <sup>31</sup>            | 1                                        | 1                                   | 1                         | 1                                                                        | 2                                                               | 1                     | 1                                                | 1                                | 9     |
| Pilgrim et al., 2016 <sup>26</sup>           | 0                                        | 1                                   | 1                         | 1                                                                        | 2                                                               | 1                     | 1                                                | 1                                | 8     |
| Rawle et al., 2020 <sup>29</sup>             | 0                                        | 1                                   | 1                         | 1                                                                        | 2                                                               | 1                     | 1                                                | 1                                | 8     |

|                                           |   |   |   |   |   |   |   |   |   |
|-------------------------------------------|---|---|---|---|---|---|---|---|---|
| Salanitro et al., 2012 <sup>41</sup>      | 1 | 1 | 1 | 1 | 2 | 1 | 1 | 1 | 9 |
| Salminen et al., 2017 <sup>39</sup>       | 0 | 1 | 0 | 1 | 2 | 1 | 1 | 1 | 7 |
| Schilp et al., 2011 <sup>34</sup>         | 1 | 1 | 1 | 1 | 2 | 1 | 1 | 1 | 9 |
| Schmidt et al., 2014 <sup>30</sup>        | 0 | 1 | 1 | 1 | 2 | 1 | 1 | 1 | 8 |
| Senoo et al., 2020 <sup>36</sup>          | 0 | 1 | 1 | 1 | 2 | 1 | 1 | 1 | 8 |
| Sheppard et al., 2013 <sup>40</sup>       | 0 | 1 | 1 | 1 | 2 | 1 | 1 | 1 | 8 |
| St John & Montgomery, 2014 <sup>21</sup>  | 1 | 1 | 1 | 1 | 2 | 1 | 1 | 1 | 9 |
| Taniguchi et al., 2019 <sup>28</sup>      | 0 | 1 | 1 | 1 | 2 | 0 | 1 | 1 | 7 |
| Tsutsumimoto et al., 2018 <sup>7</sup>    | 1 | 1 | 1 | 1 | 2 | 1 | 1 | 0 | 8 |
| Van Dronkelaar et al., 2019 <sup>42</sup> | 1 | 1 | 1 | 0 | 2 | 1 | 1 | 1 | 8 |
| Van Grootven et al., 2020 <sup>45</sup>   | 0 | 1 | 1 | 1 | 2 | 1 | 1 | 1 | 8 |
| Wijnhoven et al., 2012 <sup>22</sup>      | 1 | 1 | 1 | 1 | 2 | 1 | 1 | 1 | 9 |
| Won et al., 2019 <sup>47</sup>            | 0 | 1 | 1 | 1 | 2 | 1 | 1 | 1 | 8 |

**(B) Modified Newcastle-Ottawa Scale for cross-sectional studies<sup>14</sup>**

| Author, year                                     | Representativeness of the sample | Sample size | Respondents/ non-respondents | Ascertainment of exposure | Comparability of different outcome groups on the basis of the design or analysis | Assessment of outcome | Statistical test | Total |
|--------------------------------------------------|----------------------------------|-------------|------------------------------|---------------------------|----------------------------------------------------------------------------------|-----------------------|------------------|-------|
| Acar Tek and Karaçil-Ermumcu, 2018 <sup>63</sup> | 0                                | 1           | 1                            | 1                         | 2                                                                                | 1                     | 1                | 7     |
| Arkkukangas et al., 2020 <sup>55</sup>           | 1                                | 1           | 1                            | 0                         | 2                                                                                | 0                     | 1                | 6     |
| Berggren et al., 2020 <sup>54</sup>              | 0                                | 1           | 1                            | 1                         | 2                                                                                | 1                     | 1                | 7     |
| Buhl et al., 2021 <sup>53</sup>                  | 0                                | 1           | 1                            | 1                         | 2                                                                                | 0                     | 1                | 6     |
| Dent et al., 2018 <sup>67</sup>                  | 0                                | 1           | 1                            | 1                         | 0                                                                                | 1                     | 1                | 5     |
| Donini et al., 2011 <sup>61</sup>                | 1                                | 1           | 0                            | 1                         | 1                                                                                | 1                     | 1                | 6     |
| Donini et al., 2013 <sup>9</sup>                 | 0                                | 1           | 1                            | 1                         | 1                                                                                | 1                     | 1                | 6     |
| Fonad et al., 2015 <sup>62</sup>                 | 1                                | 1           | 1                            | 0                         | 2                                                                                | 0                     | 1                | 6     |
| Hirose et al., 2014 <sup>49</sup>                | 1                                | 1           | 1                            | 0                         | 2                                                                                | 1                     | 1                | 7     |

|                                                   |   |   |   |   |   |   |   |   |
|---------------------------------------------------|---|---|---|---|---|---|---|---|
| Kiesswetter et al., 2020 <sup>48</sup>            | 1 | 1 | 1 | 1 | 2 | 1 | 1 | 8 |
| Kim et al., 2019 <sup>60</sup>                    | 0 | 1 | 1 | 1 | 2 | 1 | 1 | 7 |
| Landi et al., 2013 <sup>64</sup>                  | 1 | 1 | 1 | 1 | 2 | 1 | 1 | 8 |
| Madeira et al., 2018 <sup>68</sup>                | 1 | 1 | 1 | 1 | 2 | 1 | 1 | 8 |
| Nakatsu et al., 2015 <sup>66</sup>                | 0 | 1 | 1 | 1 | 0 | 1 | 1 | 5 |
| Nambooze et al., 2014 <sup>52</sup>               | 1 | 1 | 1 | 1 | 2 | 1 | 1 | 8 |
| Pisu et al., 2018 <sup>58</sup>                   | 1 | 1 | 1 | 1 | 2 | 1 | 1 | 8 |
| Pohlhausen et al., 2016 <sup>50</sup>             | 1 | 1 | 0 | 1 | 1 | 1 | 1 | 6 |
| Reijnierse et al., 2015 <sup>65</sup>             | 0 | 1 | 1 | 1 | 2 | 1 | 1 | 7 |
| Tsutsumimoto et al., 2017 <sup>57</sup>           | 1 | 1 | 1 | 1 | 2 | 1 | 1 | 8 |
| Tsutsumimoto et al., 2020 <sup>56</sup>           | 1 | 1 | 1 | 1 | 2 | 1 | 1 | 8 |
| van der Pols-Vijlbrief et al., 2016 <sup>51</sup> | 0 | 1 | 1 | 1 | 1 | 1 | 1 | 6 |
| van Steijn et al., 2014 <sup>69</sup>             | 0 | 1 | 1 | 1 | 2 | 1 | 1 | 7 |
| Yamamoto et al., 2020 <sup>59</sup>               | 1 | 0 | 1 | 1 | 2 | 0 | 1 | 6 |

**Table S3** Measures used to define anorexia/appetite loss

| Measure                                                                                                                           | Description                                                                                                                                                                                                                                                                                                                                                                                     | Study references                                                                                                                                                                                                                                                                                                                           |
|-----------------------------------------------------------------------------------------------------------------------------------|-------------------------------------------------------------------------------------------------------------------------------------------------------------------------------------------------------------------------------------------------------------------------------------------------------------------------------------------------------------------------------------------------|--------------------------------------------------------------------------------------------------------------------------------------------------------------------------------------------------------------------------------------------------------------------------------------------------------------------------------------------|
| <b>Simplified Nutritional Appetite Questionnaire (SNAQ Simplified)</b> <sup>70</sup>                                              | 4-item self-report (responses on 5-point Likert-type scale, range 4–20 points), which is a subset of the 8-item CNAQ. All questions are on appetite/food consumption. Lower scores indicate decreased appetite. A score of $\leq 14$ indicates significant risk of $\geq 5\%$ weight loss within 6 months and is often used to indicate anorexia or appetite loss. Recall period: Not specified | Acar Tek and Karaçil-Ermumcu, 2018; Buhl et al., 2021; Cox et al., 2021; Cox et al., 2020; Dent et al., 2015; Dent et al., 2018; Mikami et al., 2019; Nakatsu et al., 2015; Pilgrim et al., 2016; Senoo et al., 2020; Tsutsumimoto et al., 2017; Tsutsumimoto et al., 2018; Tsutsumimoto et al., 2020; van der Pols-Vijlbrief et al., 2016 |
| <b>Short Nutritional Assessment Questionnaire (SNAQ Short)</b> <sup>71</sup>                                                      | For hospitalized subjects, 3 questions on weight loss, appetite decrease, and supplemental drinks/tube feeding. Measures nutrition and not just appetite; appetite decrease question used to assess appetite loss. Recall period: Past month                                                                                                                                                    | Mendelson et al., 2018; Reijnierse et al., 2015; van Dronkelaar et al., 2019                                                                                                                                                                                                                                                               |
| <b>Council on Nutrition Appetite Questionnaire (CNAQ)</b> <sup>70</sup>                                                           | 8-item self-report. Total scores range from 8 to 40 points; lower scores indicate deterioration in appetite. A CNAQ score $< 28$ may identify persons with anorexia at significant risk of weight loss<br>Recall period: Not specified                                                                                                                                                          | Kim et al., 2019, van Steijn et al., 2014, Yamamoto et al., 2020                                                                                                                                                                                                                                                                           |
| <b>Center for Epidemiologic Studies Depression Scale (CES-D)</b> <sup>79</sup>                                                    | Includes a question about appetite: “I did not feel like eating; my appetite was poor,” with response categories: 1 = “rarely or none of the time”; 2 = “some or little of the time”; 3 = “occasionally or moderate amount of the time”; and 4 = “most or all of the time”<br>Recall period: Past week                                                                                          | Hsu et al., 2019, Schilp et al., 2011, St John and Montgomery, 2014, Wijnhoven et al., 2012                                                                                                                                                                                                                                                |
| <b>European Organization for the Research and Treatment of Cancer Quality of Life Questionnaire (EORTC QLQ-C30)</b> <sup>80</sup> | Question 13 is on appetite: “During the past week have you lacked appetite?” 4 options: Not at all, a little, quite a bit, very much. Usually transformed to 100-point scale; 0 = best, 100 = worst. Recall period: Past week                                                                                                                                                                   | Fournier et al., 2016, Hofer et al., 2018, Kirkhus et al., 2019, Schmidt et al., 2014, Won et al., 2019                                                                                                                                                                                                                                    |
| <b>Edmonton Symptom Assessment System (ESAS)</b> <sup>81</sup>                                                                    | Includes a question on lack of appetite. Scores ranges from 0 (no lack of appetite) to 10 (worst possible lack of appetite). Recall period: Past 24 hours                                                                                                                                                                                                                                       | Berggren et al., 2020                                                                                                                                                                                                                                                                                                                      |
| <b>Functional Assessment of Anorexia/Cachexia Treatment (FAACT)</b> <sup>72</sup>                                                 | Includes Anorexia/Cachexia Treatment Subscale, 12 questions and a total score, and Functional Assessment of Cancer Treatment – General (FACT-G). Recall period: Past week                                                                                                                                                                                                                       | Berggren et al., 2020                                                                                                                                                                                                                                                                                                                      |
| <b>MD Anderson Symptom Inventory (MDASI)</b> <sup>82</sup>                                                                        | Lack of appetite, ranges from 0 (symptom not present) to 10 (worst). Recall period: Past 24 hours                                                                                                                                                                                                                                                                                               | Pisu et al., 2018                                                                                                                                                                                                                                                                                                                          |

|                                                                                       |                                                                                                                                                                                                                                                                                                                                                                                                                                                                                                                   |                                                                                                                                                                                                                                                                     |
|---------------------------------------------------------------------------------------|-------------------------------------------------------------------------------------------------------------------------------------------------------------------------------------------------------------------------------------------------------------------------------------------------------------------------------------------------------------------------------------------------------------------------------------------------------------------------------------------------------------------|---------------------------------------------------------------------------------------------------------------------------------------------------------------------------------------------------------------------------------------------------------------------|
| <b>Mini Nutritional Assessment-Short Form (MNA-SF)<sup>83</sup></b>                   | First question is on food intake. MNA-SF includes 6 items with a maximum score of 14 points, and evaluates decrease in food intake (anorexia), weight loss during last three months, mobility, acute health status (psychological stress or acute disease), neuropsychological problems (dementia or depression) and body mass index or calf circumference data. Anorexia/appetite loss defined as food intake decline and scored as severe, moderate or no decrease in food intake. Recall period: Past 3 months | Hirose et al., 2014; Huang et al., 2018; Martinez-Reig et al., 2014                                                                                                                                                                                                 |
| <b>Mini Nutritional Assessment (MNA)<sup>84</sup></b>                                 | Full form includes 18 questions, with total score = 30. Evaluates decrease in food intake (anorexia), weight loss during last three months, mobility, acute health status (psychological stress or acute disease), neuropsychological problems (dementia or depression) and body mass index, calf or mid-arm circumference data. Validated cohorts include malnourished (< 17 points), at risk of malnutrition (17–23.5 points), well nourished (≥ 24 points). Recall period: Past 3 months                       | Nambooze et al., 2014                                                                                                                                                                                                                                               |
| <b>Patient-Reported Outcomes Measurement Information System (PROMIS)<sup>85</sup></b> | Participants are asked “Would you say your appetite is usually very good, good, fair, or poor?”. Recall period: Past week                                                                                                                                                                                                                                                                                                                                                                                         | Sheppard et al., 2013                                                                                                                                                                                                                                               |
| <b>Patient-reported appetite</b>                                                      | Various assessments used. Subjects asked one or more questions about appetite and/or food intake. Recall period: Not specified/variable                                                                                                                                                                                                                                                                                                                                                                           | Arkkukangas et al., 2020; Engelheart et al., 2021; Fonad et al., 2015; Huang et al., 2014; Kanamori et al., 2012; Kiesswetter et al., 2020; Madeira et al., 2018; Pohlhausen et al., 2016; Salanitro et al., 2012; Salminen et al., 2018; Van Grootven et al., 2020 |
| <b>Staff-assessed food consumption</b>                                                | Staff reporting of food consumption over a given time period. Recall period: Not specified/variable                                                                                                                                                                                                                                                                                                                                                                                                               | Donini et al., 2011; Donini et al., 2013; Landi et al., 2013; Landi et al., 2012; Taniguchi et al., 2019                                                                                                                                                            |

CES-D, Center for Epidemiologic Studies Depression Scale; CNAQ, Council on Nutrition Appetite Questionnaire; EORTC QLQ-C30, European Organization for the Research and Treatment of Cancer Quality of Life Questionnaire; ESAS, Edmonton Symptom Assessment System; FAACT, Functional Assessment of Anorexia/Cachexia Treatment; MDASI, MD Anderson Symptom Inventory; MNA, Mini Nutritional Assessment-Short Form; MNA-SF, Mini Nutritional Assessment-Short Form; PROMIS, Patient-Reported Outcomes Measurement Information System; SNAQ Short, Short Nutritional Assessment Questionnaire; SNAQ Simplified, Simplified Nutritional Appetite Questionnaire.



**Table S4** Relationship between anorexia/appetite loss and malnutrition, as reported in 15 identified studies

| Author; year; country                                                    | Study design; sample size; follow-up time                            | Setting/cohort                                                        | Anorexia/ appetite Loss assessment     | Outcome measure                                                                                                                                                                                                                                                                          | Outcome results (association with anorexia or appetite loss)                                                                                                                                                                                                                         |
|--------------------------------------------------------------------------|----------------------------------------------------------------------|-----------------------------------------------------------------------|----------------------------------------|------------------------------------------------------------------------------------------------------------------------------------------------------------------------------------------------------------------------------------------------------------------------------------------|--------------------------------------------------------------------------------------------------------------------------------------------------------------------------------------------------------------------------------------------------------------------------------------|
| <b>Longitudinal studies</b>                                              |                                                                      |                                                                       |                                        |                                                                                                                                                                                                                                                                                          |                                                                                                                                                                                                                                                                                      |
| <b>De Almeida Mello et al.; 2020; Belgium<sup>33</sup></b>               | Retrospective longitudinal (case control); N = 6,334; 1 year         | Community-dwelling, aged ≥ 65 yrs                                     | Not reported                           | Unintentional weight loss: > 10% during past 3 months or > 5% over past month, and a BMI < 20 kg/m <sup>2</sup> (aged < 70), or < 22 kg/m <sup>2</sup> (aged ≥ 70)                                                                                                                       | Loss of appetite and risk of malnutrition as defined by unintentional weight loss<br>Adjusted OR (95% CI) = 1.76 (1.21, 2.56), p = 0.003<br>Adjusted for dysphagia, comorbidities, depression, family support, physical function, cognition, and hospitalization within last 90 days |
| <b>Schilp et al.; 2011; The Netherlands<sup>34</sup></b>                 | Prospective longitudinal; N = 1,120; 9 years, assessed every 3 years | Community-dwelling, aged ≥ 65 yrs                                     | CES-D                                  | Risk of undernutrition: BMI < 20 kg/m <sup>2</sup> or self-reported involuntary weight loss ≥ 5 % in past 6 months                                                                                                                                                                       | Association of poor appetite and risk of undernutrition<br>Adjusted HR (95%CI) = 1.63 (1.02, 2.61), p < 0.05<br>All determinants found to be statistically significantly associated with undernutrition in the univariate analyses were included in multivariate model               |
| <b>Lambert et al.; 2017; Germany<sup>15</sup></b>                        | Prospective longitudinal; N = 317; Follow-up duration not reported   | Inpatient (subset of subjects hospitalized ≥ 2 nights), aged ≥ 70 yrs | Appetite question                      | Risk of Malnutrition or existing malnutrition: NRS ≥ 3 points, MNA-SF < 12 points, MNA < 23.5 points                                                                                                                                                                                     | Risk of malnutrition or existing malnutrition and appetite loss<br>Adjusted OR (95% CI) = 4.54 (2.31, 8.90), p < 0.001<br>Adjusted for weight loss, number of medications, and frequency of vegetable consumption                                                                    |
| <b>Cross-sectional studies</b>                                           |                                                                      |                                                                       |                                        |                                                                                                                                                                                                                                                                                          |                                                                                                                                                                                                                                                                                      |
| <b>Pohlhausen et al.; 2016; Germany<sup>50</sup></b>                     | Cross-sectional; N = 353; None                                       | Community-dwelling (receiving home care), aged ≥ 65 yrs               | Appetite question (subject-reported)   | BMI (< 18.5, < 20, < 22 kg/m <sup>2</sup> )                                                                                                                                                                                                                                              | Association of poor appetite with BMI (n = 341)<br>Univariate OR (95% CI) = -1.8 (-2.5, -1.0), p < 0.001<br>Age as covariate, sex as fixed factor                                                                                                                                    |
|                                                                          |                                                                      |                                                                       |                                        | Mid-upper arm circumference < 22 cm                                                                                                                                                                                                                                                      | Association of poor appetite with mid-upper arm circumference (n = 346):<br>Univariate OR (95% CI) = -1.4 (-2.0, -0.8), p < 0.001<br>Age as covariate, sex as fixed factor                                                                                                           |
|                                                                          |                                                                      |                                                                       |                                        | Calf circumference < 31 cm, 22-25 cm                                                                                                                                                                                                                                                     | Association of poor appetite with calf circumference (n = 343):<br>Univariate OR (95% CI) = -1.4 (-2.0, -0.8), p < 0.001<br>Age as covariate, sex as fixed factor                                                                                                                    |
| <b>van der Pols-Vijlbrief et al.; 2016; The Netherlands<sup>51</sup></b> | Cross-sectional; N = 300; None                                       | Community-dwelling (receiving home care), aged ≥ 65 yrs               | SNAQ <sup>65+</sup> Simplified 4-items | Risk of undernutrition: undernourished if unintentional weight loss of ≥ 4 kg in past 6 months OR if mid-upper arm circumference < 25 cm. Considered at risk of undernutrition if loss of appetite in the last week AND inability to walk up and down stairs of 15 steps without resting | Univariate association between appetite loss (SNAQ Simplified score) and risk of undernutrition<br>Unadjusted OR (95%CI) = 0.66 (0.58, 0.76), p < 0.05                                                                                                                               |

|                                                       |                                                                                       |                                                                                                                                                           |                                                                |                                                                                                                                 |                                                                                                                                                                                                                                                                                                                                                                                                                                                                                                                                                                                                                                    |
|-------------------------------------------------------|---------------------------------------------------------------------------------------|-----------------------------------------------------------------------------------------------------------------------------------------------------------|----------------------------------------------------------------|---------------------------------------------------------------------------------------------------------------------------------|------------------------------------------------------------------------------------------------------------------------------------------------------------------------------------------------------------------------------------------------------------------------------------------------------------------------------------------------------------------------------------------------------------------------------------------------------------------------------------------------------------------------------------------------------------------------------------------------------------------------------------|
| Berggren et al.;<br>2020;<br>Sweden <sup>54</sup>     | Cross-sectional;<br>N = 121;<br>None                                                  | Community-dwelling<br>(older subjects<br>receiving home care)                                                                                             | ESAS, Q7 (lack of<br>appetite)                                 | Risk of malnutrition vs no<br>risk of malnutrition<br>(MNA-SF used to screen<br>individuals at risk for<br>malnutrition)        | Worst (highest) mean rank score on ESAS Q7 lack of appetite and malnutrition risk:<br>(ordinal regression) adjusted OR (95% CI) = 2.37 (1.21, 4.64)<br>Adjusted for sex, age, and living alone. Scale transformed to 1 to 5.<br>ESAS Q7 appetite score (lower is better):<br>No malnutrition mean rank (95% CI) = 2.0 (1.3, 2.6) vs malnutrition<br>risk = 3.4 (2.5, 4.3), p = 0.012                                                                                                                                                                                                                                               |
|                                                       |                                                                                       |                                                                                                                                                           | FAACT, Q1 (I have a<br>good appetite) and<br>total FAACT score | Risk of malnutrition vs no<br>risk of malnutrition<br>(MNA-SF used to screen<br>individuals at risk for<br>malnutrition)        | FAACT Q1 worst (highest) score on 'I have a good appetite' and malnutrition risk:<br>(ordinal regression) adjusted OR (95% CI) = 2.75 (1.38, 5.50)<br>Adjusted for sex, age, and living alone<br>FAACT Q1 mean rank:<br>No malnutritional risk (95% CI) = 1.0 (0.8, 1.3) vs nutritional risk 1.6<br>(1.3, 1.9), p = 0.004<br>FAACT total score and malnutrition risk:<br>p=0.001 for Fisher exact test, proportional odds assumption is not<br>satisfied for ordinal logistic regression<br>FAACT total score mean rank:<br>No malnutritional risk (95% CI) = 8.4 (7.4, 9.3) vs nutritional risk =<br>13.5 (11.4, 15.7), p = 0.001 |
| Buhl et al.;<br>2021;<br>Denmark <sup>53</sup>        | Cross-sectional;<br>N = 126;<br>None                                                  | Community-dwelling,<br>aged ≥ 80 yrs                                                                                                                      | SNAQ Simplified                                                | Low protein intake                                                                                                              | Reduced appetite and odds of low protein intake<br>Adjusted OR = 3.06, 95% CI (1.23, 7.63), p = 0.02<br>Adjusted for age, sex, BMI category, and number of diseases                                                                                                                                                                                                                                                                                                                                                                                                                                                                |
| Nakatsu et al.;<br>2015;<br>Japan <sup>66</sup>       | Cross-sectional;<br>N = 84;<br>None                                                   | Community-dwelling,<br>aged ≥ 65 yrs                                                                                                                      | SNAQ Simplified                                                | Nutritional status (MNA-SF)                                                                                                     | Pearson correlations between SNAQ Simplified score and nutritional status MNA-SF: r =<br>0.3, p < 0.05                                                                                                                                                                                                                                                                                                                                                                                                                                                                                                                             |
| Nambooze et al.;<br>2014;<br>Laos <sup>52</sup>       | Cross-sectional;<br>N = 144;<br>None                                                  | Community-dwelling,<br>aged ≥ 65 yrs,<br>3 ethnic groups (Oy,<br>Brau, and Lao)                                                                           | MNA Q1 (food intake<br>question)                               | Risk of malnutrition                                                                                                            | Logistic regression between reduced appetite and MNA score by ethnic group<br>Coefficient (beta):<br>Oy = -1.15, p < 0.01<br>Brau = -0.99, p < 0.01<br>Lao = -0.96, p < 0.05<br>Adjusted for BMI, meals consumed/d, comorbidities, neuropsychological stress, and<br>activities of daily living.                                                                                                                                                                                                                                                                                                                                   |
| Kiesswetter et al.;<br>2020;<br>Germany <sup>48</sup> | Cross-sectional;<br>N = 1,785 from 4<br>separate cross-<br>sectional studies;<br>None | Community-dwelling<br>[n = 1073],<br>institutional care<br>[geriatric day<br>hospital n = 180],<br>home care [n = 335],<br>and nursing home [n<br>= 197]) | Appetite question<br>(subject-reported)                        | Protein–energy malnutrition                                                                                                     | Association of poor appetite and malnutrition by residential setting:<br>Adjusted OR (95%CI):<br>Community dwelling = 2.42 (1.43, 4.10)<br>Geriatric day hospital = 8.01 (3.48, 18.44)<br>Home care = 3.99 (2.10, 7.58)<br>Nursing home = not included in adjusted models but<br>significant in univariate model (2.55 [1.19, 5.48])<br>Adjusted for age, gender, and number of individual risk factors (out of 20) from the<br>domains of health status, mental function, physical function, and dietary intake and<br>behavior                                                                                                   |
| Dent et al.;<br>2018;<br>Australia <sup>67</sup>      | Cross-sectional;<br>N = 172<br>Malnourished: 53<br>At risk: 84<br>Well nourished:     | Inpatient, aged ≥ 70<br>yrs                                                                                                                               | SNAQ Simplified                                                | Malnourished, at risk, or<br>well nourished based on<br>MNA: malnourished (< 17<br>points), at risk of<br>malnutrition (17–23.5 | Mean (SD) SNAQ Simplified score (out of 20) by nutrition status by MNA (full) score (out of<br>30)<br>Malnourished = 11.7 (3.3)<br>At risk = 13.3 (2.9)<br>Well nourished = 15.1 (2.6); p < 0.001                                                                                                                                                                                                                                                                                                                                                                                                                                  |

|                                                              |                                         |                                                                                |                                      |                                                                                                                                             |                                                                                                                                                                                                                                                                                                                                                                                                                       |
|--------------------------------------------------------------|-----------------------------------------|--------------------------------------------------------------------------------|--------------------------------------|---------------------------------------------------------------------------------------------------------------------------------------------|-----------------------------------------------------------------------------------------------------------------------------------------------------------------------------------------------------------------------------------------------------------------------------------------------------------------------------------------------------------------------------------------------------------------------|
|                                                              | 35;<br>None                             |                                                                                |                                      | points), well nourished ( $\geq 24$ points)                                                                                                 |                                                                                                                                                                                                                                                                                                                                                                                                                       |
| <b>Madeira et al.; 2018; Portugal<sup>68</sup></b>           | Cross-sectional ;<br>N = 1,186;<br>None | Institutional care (nursing home residents, without cognitive impairment)      | Appetite question (subject-reported) | Risk of malnutrition (based on MNA 17–23.5 points)                                                                                          | Appetite and risk of malnutrition in subjects without cognitive impairment (n = 522)<br>Adjusted OR (95% CI):<br>No/little appetite = 6.46 (2.72, 15.34), p < 0.05<br>Some appetite = 2.61 (1.23, 5.53), p < 0.05<br>Reference: Lots of appetite<br>Adjusted for sex, age, financial situation, eating difficulties, depression, functional status and loneliness                                                     |
| <b>Donini et al.; 2013; Italy<sup>9</sup></b>                | Cross-sectional;<br>N = 100;<br>None    | Institutional care (nursing home residents)                                    | Food consumption (staff assessed)    | Nutritional status based on MNA: malnourished (< 17 points), at risk of malnutrition (17–23.5 points), well nourished ( $\geq 24$ points)   | Appetite by nutritional status (p = 0.000):<br>Good Appetite by nutritional status (%):<br>Normal = 83.3<br>At Risk = 45.6<br>Malnutrition = 39<br>Decreased Appetite by nutritional status (%)<br>Normal = 16.7<br>At Risk = 39.2<br>Malnutrition = 41.6<br>Scarce Appetite by nutritional status (%)<br>Normal = 0<br>At Risk = 15.2<br>Malnutrition = 19.4<br>Absent Appetite (0 for all 3 nutritional categories) |
| <b>Hirose et al.; 2014; Japan<sup>49</sup></b>               | Cross-sectional;<br>N = 1,098;<br>None  | Other (mixed community-dwelling, n = 511) and nursing home residents, n = 587) | MNA-SF Q1 (food intake question)     | Nutritional status based on MNA-SF: malnourished (0-7 points), at risk of malnutrition (8-11 points), well nourished ( $\geq 12-14$ points) | Appetite loss and malnutrition<br>Adjusted OR (95% CI) = 16.45 (7.84, 34.54), p < 0.001<br>Adjusted for sex, age, community or nursing home residence, and geriatric conditions<br>N (%) subjects with appetite loss, p < 0.001:<br>MNA-SF score $\leq 7$ = 123 (56.2)<br>MNA-SF (8–11) = 148 (25.2)<br>MNA-SF (12–14) = 21 (7.9)                                                                                     |
| <b>van Steijn et al.; 2014; The Netherlands<sup>69</sup></b> | Cross-sectional;<br>N = 102;<br>None    | Other (outpatients with Parkinson's disease)                                   | CNAQ                                 | Risk of malnutrition based on MNA: malnourished (< 17 points), at risk of malnutrition (17–23.5 points), well nourished ( $\geq 24$ points) | Increase in CNAQ score (per point) and odds of an unfavorable nutritional status<br>Adjusted OR = 0.82 (95% CI 0.70, 0.95), p = 0.008<br>Adjusted for comorbidity, loneliness, disease stage, dependency, total hours assistance, swallowing or chewing disorders, falls, nausea, depressive symptoms, cognitive disturbances                                                                                         |

BMI, body mass index; CES-D, Center for Epidemiologic Studies Depression Scale; CI, confidence interval; CNAQ, Council on Nutrition Appetite Questionnaire; ESAS, Edmonton Symptom Assessment System; FAACT, Functional Assessment of Anorexia/Cachexia Treatment; GDS, Geriatric Depression Scale; HR, hazard ratio; MDASI, MD Anderson Symptom Inventory; MNA, Mini Nutritional Assessment; MNA-SF, Mini Nutritional Assessment-Short Form; OR, odds ratio; Q, question; SNAQ Simplified, Simplified Nutritional Appetite Questionnaire; yr(s), year(s).

**Table S5** Relationship between anorexia/appetite loss and mortality as reported in 18 identified studies

| Author; year; country                                  | Study design; sample size; follow-up                                                  | Setting/cohort                                               | Anorexia/appetite loss assessment    | Outcome measure          | Outcome results (association with anorexia or appetite loss)                                                                                                                                                                                                                                                                                                                              |
|--------------------------------------------------------|---------------------------------------------------------------------------------------|--------------------------------------------------------------|--------------------------------------|--------------------------|-------------------------------------------------------------------------------------------------------------------------------------------------------------------------------------------------------------------------------------------------------------------------------------------------------------------------------------------------------------------------------------------|
| Hippisley-Cox et al.; 2017; UK (England) <sup>16</sup> | Prospective longitudinal; N = 1,466,598; 5 yrs                                        | Community-dwelling, aged ≥ 65 yrs                            | Mentioned in health record           | 1-yr all-cause mortality | Appetite loss in past 12 months and all-cause mortality in the derivation cohort<br>Adjusted HR (95% CI):<br>Women = 1.30 (1.21, 1.39)<br>Men = 1.35 (1.24, 1.48)<br>Adjusted for age, ethnicity, comorbidities, clinical values, hospitalizations, care home residence, smoking, alcohol use, corticosteroids, and antipsychotics                                                        |
| Cai et al.; 2020; UK (England) <sup>17</sup>           | Retrospective longitudinal; N = 4243; Median (IQR) follow-up time = 3.5 (1.5–6.4) yrs | Community-dwelling with depression, aged ≥ 65 yrs            | Mentioned in health record           | Risk of mortality        | Lack of appetite and mortality risk<br>Adjusted HR (95% CI) = 1.14 (1.04, 1.26), p = 0.008<br>Adjusted for age, gender, ethnicity, cohabiting status, IMD score, depression severity, physical illness, disability, ADL problems and cognitive problems, depressive symptoms and antipsychotic prescription                                                                               |
| Landi et al.; 2012; Italy <sup>18</sup>                | Prospective longitudinal; N = 2787; 1 yr                                              | Community-dwelling and receiving in-home care, aged ≥ 65 yrs | Food consumption (staff assessed)    | Risk of mortality        | Risk of mortality and anorexia<br>Adjusted RR (95% CI) = 1.83 (1.45, 2.31)<br>Adjusted for age, gender, living alone, physical and cognitive disability, depression, geriatric conditions, and comorbidities                                                                                                                                                                              |
|                                                        | Prospective longitudinal; N = 1616; 1 yr                                              | Subjects with cognitive impairment                           | Food consumption (staff assessed)    | Risk of mortality        | Risk of mortality and anorexia for subjects with cognitive impairment<br>Adjusted RR (95% CI) = 1.55 (1.16, 2.02)<br>Adjusted for age, gender, living alone, physical and cognitive disability, depression, geriatric conditions, and comorbidities                                                                                                                                       |
|                                                        | Prospective longitudinal; N = 1171; 1 yr                                              | Subjects without cognitive impairment                        | Food consumption (staff assessed)    | Risk of mortality        | Risk of mortality and anorexia for subjects without cognitive impairment<br>Adjusted RR (95% CI) = 2.29 (1.53, 3.43)<br>Adjusted for age, gender, living alone, physical and cognitive disability, depression, geriatric conditions, and comorbidities                                                                                                                                    |
|                                                        | Prospective longitudinal; N = 185; 1 yr                                               | Subjects without weight loss                                 | Food consumption (staff assessed)    | Risk of mortality        | Risk of mortality and anorexia for subjects without weight loss<br>Adjusted RR (95% CI) = 1.45 (1.01, 2.19)<br>Adjusted for age, gender, living alone, physical and cognitive disability, depression geriatric conditions, and comorbidities                                                                                                                                              |
|                                                        | Prospective longitudinal; N = 559; 1 yr                                               | Subjects with weight loss                                    | Food consumption (staff assessed)    | Risk of mortality        | Risk of mortality and anorexia for subjects with weight loss<br>Adjusted RR (95% CI) = 1.98 (1.53, 2.54)<br>Adjusted for age, gender, living alone, physical and cognitive disability, depression, geriatric conditions, and comorbidities                                                                                                                                                |
| Huang et al.; 2014; Taiwan <sup>19</sup>               | Retrospective longitudinal; N = 1856; 8.76 yrs median                                 | Community dwelling aged ≥ 65 yrs                             | Appetite question (subject-reported) | All-cause mortality      | Association between poor appetite and risk of all-cause mortality<br>Adjusted HR (95% CI) = 2.00 (1.55, 2.57)<br>Adjusted for age, gender & education<br>The HR was no longer significant when additional factors were included (i.e., physical activity, body mass index, vitality, cognitive impairment, chewing ability, appetite changed, dietary diversity score and general health) |
| St John and Montgomery;                                | Prospective longitudinal;                                                             | Community-dwelling, aged ≥ 65 yrs                            | CES-D                                | 5-yr mortality           | Poor appetite as a predictor of 5-yr mortality:<br>Adjusted HR (95% CI) = 1.63 (1.31, 2.03)<br>Adjusted for age, sex, education, and functional status                                                                                                                                                                                                                                    |

|                                                                     |                                                                                                     |                                                                                     |                                      |                             |                                                                                                                                                                                                                                                           |
|---------------------------------------------------------------------|-----------------------------------------------------------------------------------------------------|-------------------------------------------------------------------------------------|--------------------------------------|-----------------------------|-----------------------------------------------------------------------------------------------------------------------------------------------------------------------------------------------------------------------------------------------------------|
| <b>2014;<br/>Canada<sup>21</sup></b>                                | N = 1751;<br>5 yrs                                                                                  |                                                                                     |                                      |                             | Association of combined poor cognition and poor appetite as a predictor of 5-yr mortality:<br>Adjusted HR (95% CI) = 1.50 (1.19, 1.86)<br>Adjusted for age, sex, education, and functional status                                                         |
| <b>Wijnhoven et al.;<br/>2012;<br/>The Netherlands<sup>22</sup></b> | Retrospective longitudinal;<br>N = 1687;<br>6 yrs                                                   | Community-dwelling, aged ≥ 65 yrs, Longitudinal Aging Study Amsterdam (LASA) cohort | CES-D                                | 6-yr mortality              | Poor appetite last week (%):<br>Survived = 11.6<br>Died = 16.8, p = 0.006                                                                                                                                                                                 |
| <b>Huang et al.;<br/>2018;<br/>Taiwan<sup>20</sup></b>              | Retrospective longitudinal;<br>N = 1687;<br>15 yrs                                                  | LASA Cohort                                                                         | CES-D                                | 15-yr mortality             | Poor appetite last week (%):<br>Male: Survived = 5.3 vs Died = 10.7, p = 0.023<br>Female: Survived = 12.4 vs Died = 20.2, p = 0.004                                                                                                                       |
|                                                                     | Retrospective longitudinal;<br>N = 471;<br>Follow-up from date of interview to death or Dec 31 2008 | Community-dwelling, aged ≥ 65 yrs, males                                            | MNA-SF Q1 (food intake question)     | Death                       | Males:<br>Appetite status, adjusted HR (95% CI):<br>Fair = 0.34 (0.18, 0.63)<br>Good = 0.23 (0.13, 0.42)<br>Poor = 1 (ref), p = 0.0002<br>Gender-specific model adjusted for appetite, eating with others, dietary diversity score, and body mass index   |
| <b>Fournier et al.;<br/>2016;<br/>France<sup>23</sup></b>           | Retrospective longitudinal;<br>N = 474;<br>Follow-up from date of interview to death or Dec 31 2008 | Community-dwelling, aged ≥ 65 yrs, females                                          | MNA-SF Q1 (food intake question)     | Death                       | Females:<br>Appetite status, adjusted HR (95% CI):<br>Fair = 0.96 (0.45, 2.07)<br>Good = 0.90 (0.46, 1.77)<br>Poor = 1 (ref), p = 0.94<br>Gender-specific adjusted model: adjusted for frequency of cooking, dietary diversity score, and body mass index |
|                                                                     | Prospective longitudinal;<br>N = 108;<br>5 yrs                                                      | Community-dwelling<br>EORTC QLQ-C30 response: 3 m vs baseline                       | EORTC QLQ-C30                        | 5-yr relative survival rate | Decline >10 points in appetite from baseline to 3 month and 5 yr survival<br>Adjusted HR (95% CI) = 4.7 (1.4, 15.6); p = 0.013<br>Adjusted for sex, age category, tumor stage, and receipt of chemotherapy or radiotherapy                                |
| <b>Engelheart et al.;<br/>2021;<br/>Sweden<sup>24</sup></b>         | Prospective longitudinal;<br>N = 108;<br>Annual for 3 yrs                                           | EORTC QLQ-C30 response 6m vs baseline                                               | EORTC QLQ-C30                        | 5-yr relative survival rate | Decline >10 points in appetite from baseline to 6 month and 5 yr survival<br>Adjusted HR (95% CI) = 3.7 (1.6, 8.4), p = 0.002<br>Adjusted for sex, age category, tumor stage, and receipt of chemotherapy or radiotherapy.                                |
|                                                                     |                                                                                                     | Community-dwelling in need of care at home, aged ≥ 65 yrs                           | Appetite question (subject-reported) | 3-yr survival               | Difference between appetite score at baseline between survivors and non-survivors<br>Appetite as measured by VAS, (0-10):<br>Survivors (n = 35) mean = 6.70<br>Non-survivors (n = 20) mean = 4.7, p < 0.05, by Mann-Whitney U test                        |

|                                                        |                                                                 |                                                                                                  |                                   |                                                                  |                                                                                                                                                                                                                                                                                                                                                                                                                                                                                                                                                                                    |
|--------------------------------------------------------|-----------------------------------------------------------------|--------------------------------------------------------------------------------------------------|-----------------------------------|------------------------------------------------------------------|------------------------------------------------------------------------------------------------------------------------------------------------------------------------------------------------------------------------------------------------------------------------------------------------------------------------------------------------------------------------------------------------------------------------------------------------------------------------------------------------------------------------------------------------------------------------------------|
| <b>Cox et al.; 2020; England<sup>25</sup></b>          | Retrospective longitudinal; N = 296; 6 months                   | Inpatient, aged ≥ 70 yrs                                                                         | SNAQ Simplified                   | Mortality within 6 months and SNAQ (per point decrease in score) | Mortality within 6 months and SNAQ (per point decrease in score)<br>Adjusted OR (95% CI) = 1.22 (1.07, 1.39), p = 0.002<br>Adjusted for length of stay, comorbidity index and gender                                                                                                                                                                                                                                                                                                                                                                                               |
|                                                        |                                                                 |                                                                                                  |                                   | Mortality within 6 months for SNAQ < 14 vs SNAQ ≥ 14             | Mortality within 6 months for SNAQ < 14 vs SNAQ ≥ 14<br>Adjusted OR = 2.62 (1.30, 5.27), p = 0.007<br>Adjusted for length of stay, comorbidity index and gender                                                                                                                                                                                                                                                                                                                                                                                                                    |
| <b>Pilgrim et al.; 2016; UK (England)<sup>26</sup></b> | Prospective longitudinal; N = 178; 6 months                     | Inpatient (geriatric ward), “elderly” female                                                     | SNAQ Simplified                   | Death by time of follow-up                                       | Mortality within 6-months and association with poor appetite (SNAQ <14)<br>Adjusted HR (95% CI) = 2.29 (1.12, 4.68), p = 0.023 (n = 173)<br>Adjusted for hospital length of stay and number of comorbidities                                                                                                                                                                                                                                                                                                                                                                       |
| <b>Hofer et al.; 2018; Austria<sup>27</sup></b>        | Prospective longitudinal; N = 149; 4 yrs                        | Inpatient, aged > 67 yrs                                                                         | EORTC QLQ-C30                     | 4-yr overall survival                                            | Univariate analysis of overall survival and appetite loss<br>Unadjusted HR (95% CI) = 2.21 (1.36, 3.58), p < 0.001<br>Loss of appetite was not assessed in the multivariate analysis                                                                                                                                                                                                                                                                                                                                                                                               |
| <b>Taniguchi et al.; 2019; Japan<sup>28</sup></b>      | Retrospective longitudinal; N = 139; 2 yrs                      | Inpatient (underwent TAVI)                                                                       | Food consumption (staff assessed) | 1-yr mortality                                                   | 1-yr mortality, all subjects, n (%) = 6 (4.3)<br>1-yr mortality, good appetite vs less appetite, n (%) = 4 (3.8) vs 2 (5.9), p = 0.46                                                                                                                                                                                                                                                                                                                                                                                                                                              |
|                                                        |                                                                 |                                                                                                  |                                   | 2-yr mortality                                                   | 2-year mortality, all subjects, n (%) = 10 (7.2)<br>2-year mortality, good appetite vs less appetite, n (%) = 4 (3.8) vs 6 (17.6), p = 0.01                                                                                                                                                                                                                                                                                                                                                                                                                                        |
| <b>Rawle et al.; 2020; UK (England)<sup>29</sup></b>   | Retrospective longitudinal; N = 134; Death or discharge         | Inpatient (Hospitalized with COVID-19, from community or care home), aged ≥ 80 yrs               | Mentioned in health record        | Death during COVID-19 hospitalization                            | Anorexia as presenting symptom and mortality by residential status<br>Unadjusted OR (95% CI):<br>Total anorexia (n = 134) = 3.20 (1.21, 10.09), p = 0.028<br>Community dwelling anorexia (n = 70) = 1.59 (0.41, 7.81), p = 0.527<br>Care home anorexia (n = 64) = 6.15 (1.51, 41.83), p = 0.024<br>Mortality of COVID-19 cases with anorexia from care home (n = 64)<br>Adjusted OR (95% CI) = 7.78 (1.53, 64.14), p = 0.026<br>Multivariable regression model with backward stepwise elimination until only statistically significant (p < 0.05) variables remained in the model. |
| <b>Schmidt et al.; 2014; Germany<sup>30</sup></b>      | Prospective longitudinal; N = 126; 3 and 12 months              | Inpatient scheduled for gastrointestinal, genitourinary, or gynecological surgery, aged ≥ 65 yrs | EORTC QLQ-C30                     | 1-yr mortality risk per point (out of 100) of appetite loss      | 1-yr mortality risk per point (out of 100) of appetite loss<br>Adjusted OR (95% CI) = 1.02 (1.00, 1.03), p = 0.011<br>Adjusted for age, gender and distant metastases                                                                                                                                                                                                                                                                                                                                                                                                              |
| <b>Landi et al.; 2013; Italy<sup>8</sup></b>           | Prospective longitudinal; N = 1904<br>1490 with 1 yr data; 1 yr | Institutional care (nursing home), aged ≥ 65 yrs                                                 | Food consumption (staff assessed) | 1-yr mortality                                                   | Mortality occurred in 271 (18.2%) subjects; 33.9% with anorexia died vs 15.9% without anorexia (p < 0.001)<br>1-yr mortality for subjects with vs without anorexia:<br>Adjusted HR (95% CI) = 2.26 (2.14, 2.38)<br>Adjusted for age, sex, functional and cognitive impairment, depression, geriatric conditions, renal failure, number of drugs, proton pump inhibitors and opioids                                                                                                                                                                                                |
| <b>Mikami et al.; 2019; Japan<sup>31</sup></b>         | Prospective longitudinal;                                       | Institutional care (nursing home)                                                                | SNAQ Simplified<br>CNAQ           | 1-yr mortality                                                   | Association of appetite assessment tools with mortality at 1 yr<br>Adjusted HR (95% CI):<br>CNAQ score = 0.91 (0.86, 0.97), p = 0.004                                                                                                                                                                                                                                                                                                                                                                                                                                              |

|                                                          |                                                                                               |                                                                    |                                         |                 |                                                                                                                                                                                                                                                                                                                                                                                                                                                                                                                                                                            |
|----------------------------------------------------------|-----------------------------------------------------------------------------------------------|--------------------------------------------------------------------|-----------------------------------------|-----------------|----------------------------------------------------------------------------------------------------------------------------------------------------------------------------------------------------------------------------------------------------------------------------------------------------------------------------------------------------------------------------------------------------------------------------------------------------------------------------------------------------------------------------------------------------------------------------|
| <b>Kanamori et al.;<br/>2012;<br/>Japan<sup>32</sup></b> | N = 254;<br>1 yr<br><br>Prospective<br>longitudinal;<br>N = 72;<br>3 yrs (trial end or death) | Other<br>(outpatient<br>receiving<br>hemodialysis, ≥<br>65 yr old) | Appetite question<br>(subject-reported) | All-cause death | SNAQ score = 0.83 (0.74, 0.92), p = 0.001<br>SNAQ-Japanese Elderly score = 0.84 (0.76, 0.92), p < 0.001<br>Adjusted for age, sex, medical history, Barthel index, clinical dementia rating, MNA-SF<br>Median Appetite VAS score (0-100) for older subjects was 76.5<br>Mortality (Kaplan–Meier analysis) and appetite: cut off point > 75 vs ≤ 74, p = 0.683<br>Association between mortality and appetite in older cohort:<br>Adjusted RR (95% CI): 1.05 (1.01, 1.10), p = 0.025<br>Adjusted for age, gender, duration of hemodialysis, laboratory data and comorbidities |
|----------------------------------------------------------|-----------------------------------------------------------------------------------------------|--------------------------------------------------------------------|-----------------------------------------|-----------------|----------------------------------------------------------------------------------------------------------------------------------------------------------------------------------------------------------------------------------------------------------------------------------------------------------------------------------------------------------------------------------------------------------------------------------------------------------------------------------------------------------------------------------------------------------------------------|

ADL, activities of daily living; CES-D, Center for Epidemiological Studies Depression Scale; CI, confidence interval; CNAQ, Council on Nutrition Appetite Questionnaire; EORTC QLQ-C30, European Organization for the Research and Treatment of Cancer Quality of Life Questionnaire; HR, hazard ratio; IQR, interquartile range; IMD, index of multiple deprivation; MNA-SF, Mini Nutritional Assessment-Short Form; OR, odds ratio; RR, relative risk; SNAQ Simplified, Simplified Nutritional Appetite Questionnaire; TAVI, transcatheter aortic valve implantation; VAS, visual analogue scale; yr, year.

**Table S6** Relationship between anorexia/appetite loss and sarcopenia indicators as reported in 7 identified studies

| Author; year; country                                           | Study design; sample size; follow-up                                                           | Setting/cohort                                                                     | Anorexia/appetite loss assessment | Outcome measure                  | Outcome results (association with anorexia or appetite loss)                                                                                                                                                                                                                                                                                                                                                                 |
|-----------------------------------------------------------------|------------------------------------------------------------------------------------------------|------------------------------------------------------------------------------------|-----------------------------------|----------------------------------|------------------------------------------------------------------------------------------------------------------------------------------------------------------------------------------------------------------------------------------------------------------------------------------------------------------------------------------------------------------------------------------------------------------------------|
| <b>Longitudinal studies</b>                                     |                                                                                                |                                                                                    |                                   |                                  |                                                                                                                                                                                                                                                                                                                                                                                                                              |
| <b>Pilgrim et al.; 2016; UK<sup>26</sup></b>                    | Prospective longitudinal; N = 178; 6 months                                                    | Inpatient (all women defined as "elderly")                                         | SNAQ Simplified                   | Grip strength at 6 months        | Grip strength and association with poor appetite (SNAQ < 14)<br>Adjusted regression coefficient (95% CI) = -1.83 (-4.01, 0.34), p = 0.098<br>Adjusted for length of stay, time from discharge to follow-up, and number of comorbidities                                                                                                                                                                                      |
| <b>Cox et al.; 2021; UK<sup>35</sup></b>                        | Prospective longitudinal (baseline data reported); N = 114<br>53 cases<br>61 controls;<br>None | Community-dwelling subjects with data regarding markers of sarcopenia (all female) | SNAQ Simplified                   | Chair stand time                 | Mean (SD) chair stand time (s):<br>Cases SNAQ Simplified <14 = 11.03 (4.98)<br>Controls SNAQ Simplified >14 = 9.26 (2.51), p=0.02<br>Among individuals with reduced muscle strength, a larger percentage were cases than controls, p=0.02                                                                                                                                                                                    |
|                                                                 |                                                                                                |                                                                                    |                                   | Reduced muscle mass              | Reduced muscle mass (<0.6 kg/m <sup>2</sup> ), n:<br>Cases = 33<br>Controls n = 28, p = 0.6<br>Mean (SD) muscle mass (ALM/height <sup>2</sup> ):<br>Cases = 5.82 (0.69)<br>Controls = 6.02 (0.80), p = 0.6                                                                                                                                                                                                                   |
| <b>Senoo et al; 2020; Japan<sup>36</sup></b>                    | Prospective longitudinal; N = 34; 3 years                                                      | Community-dwelling, Poor appetite (+)/LMF (-)<br>Subjects aged ≥ 75 yrs            | SNAQ Simplified                   | Sarcopenia during 3-yr follow-up | Incidence rate and adjusted HR for sarcopenia during the 3-yr follow-up according to appetite and masticatory function<br>Unadjusted rate per 1000 person years = 79.5, cases (n = 7), person years of follow-up = 88<br>Adjusted HR (95% CI) = 2.0 (0.7, 5.8), p = 0.21 vs poor appetite (-)/LMF (-)<br>Adjusted for interaction between poor appetite and LMF, age, depressive symptoms, cognitive impairment, and low BMI |
|                                                                 | Prospective longitudinal; N = 23; 3 years                                                      | Community-dwelling, Poor appetite (+)/LMF (+)<br>Subjects aged ≥ 75 yrs            | SNAQ Simplified                   | Sarcopenia during 3-yr follow-up | Incidence rate and adj HR for sarcopenia during the 3-yr follow-up according to appetite and masticatory function<br>Unadjusted rate per 1000 person years = 163.6, cases (n = 9), person years of follow-up = 55<br>Adjusted HR (95% CI) = 4.4 (1.6, 12.2), p = 0.01 vs poor appetite (-)/LMF (-)<br>Adjusted for interaction between poor appetite and LMF, age, depressive symptoms, cognitive impairment, and low BMI    |
| <b>van Dronkelaar et al; 2019; The Netherlands<sup>42</sup></b> | Prospective longitudinal; N = 400; 1 and 3 months post-hospital discharge                      | Inpatient (acute) aged ≥70 yrs (longitudinal cohort)                               | SNAQ Short-appetite loss question | Muscle strength                  | Longitudinal association of decreased appetite (vs no decreased appetite) with muscle strength as a marker for sarcopenia<br>Across all time points:<br>Adjusted β (95% CI) = -1.09 (-1.72, -0.46), p = 0.001<br>At 3 months:<br>Adjusted β (95% CI) = -2.97 (-4.35; -1.58), p < 0.001<br>Adjusted for age, gender, cognitive impairment, fatigue, depression, comorbidity, and skeletal muscle mass                         |



|  |  |  |  |                      |                                                                                                                                                                                                                                                                                                                                                                                                                                                                                         |
|--|--|--|--|----------------------|-----------------------------------------------------------------------------------------------------------------------------------------------------------------------------------------------------------------------------------------------------------------------------------------------------------------------------------------------------------------------------------------------------------------------------------------------------------------------------------------|
|  |  |  |  | Skeletal muscle mass | <p>Longitudinal association of decreased appetite (vs no decreased appetite) with skeletal muscle mass as a marker for sarcopenia</p> <p>Across all time points:<br/>Adjusted <math>\beta</math> (95% CI) = -0.02 (-0.46, 0.42), <math>p = 0.920</math></p> <p>At 3 months:<br/>Adjusted <math>\beta</math> (95% CI) = -0.19 (-0.81, 1.18), <math>p = 0.713</math></p> <p>Adjusted for age, gender, cognitive impairment, fatigue, depression, comorbidity</p>                          |
|  |  |  |  | Mobility             | <p>Longitudinal association of decreased appetite (vs no decreased appetite) with mobility as a marker for sarcopenia</p> <p>Across all time points:<br/>Adjusted <math>\beta</math> (95% CI) = -3.89 (-6.06, -1.73), <math>p &lt; 0.001</math></p> <p>At 3 months:<br/>Adjusted <math>\beta</math> (95% CI): 1.18 (-3.64, 5.99), <math>p = 0.632</math></p> <p>Adjusted for age, gender, cognitive impairment, fatigue, depression, comorbidity, and fear of falling</p>               |
|  |  |  |  | Physical performance | <p>Longitudinal association of decreased appetite (vs no decreased appetite) with physical performance as a marker for sarcopenia</p> <p>Across all time points:<br/>Adjusted <math>\beta</math> (95% CI) = -0.71 (-1.08, -0.33), <math>p &lt; 0.001</math></p> <p>At 3 months:<br/>Adjusted <math>\beta</math> (95% CI) = -0.10 (-0.93; 0.73), <math>p = 0.815</math></p> <p>Adjusted for age, gender, cognitive impairment, fatigue, depression, comorbidity, and fear of falling</p> |

**Cross-sectional**

|                                                             |                                      |                                                                          |                                                            |                      |                                                                                                                                                                                                                                                                                                                                                                                                                                                                                                                                                                                                                                                         |
|-------------------------------------------------------------|--------------------------------------|--------------------------------------------------------------------------|------------------------------------------------------------|----------------------|---------------------------------------------------------------------------------------------------------------------------------------------------------------------------------------------------------------------------------------------------------------------------------------------------------------------------------------------------------------------------------------------------------------------------------------------------------------------------------------------------------------------------------------------------------------------------------------------------------------------------------------------------------|
| <b>Landi et al; 2013; Italy<sup>64</sup></b>                | Cross-sectional;<br>N = 354;<br>None | Community-dwelling subjects in baseline assessment of the iSIRENTE study | Food consumption and appetite questions (subject-reported) | Risk of sarcopenia   | <p>Association between anorexia (vs no anorexia) and sarcopenia</p> <p>Main analysis (all subjects):<br/>Adjusted OR (95% CI) = 1.88 (1.01, 3.51)</p> <p>Sub-group analyses:<br/>Excluding 20 (5.6 %) subjects with significant weight loss:<br/>Adjusted OR (95% CI) = 1.97 (1.09, 3.58)</p> <p>Excluding 43 (12.1 %) subjects with BMI &lt;20 kg/m<sup>2</sup>:<br/>Adjusted OR (95% CI) = 1.89 (1.01, 3.55)</p> <p>Adjusted for age, gender, functional and cognitive impairment, physical activity, urinary incontinence, comorbidity, congestive heart failure, COPD, depression, anticholinergic drugs, TNF-<math>\alpha</math> plasma levels</p> |
| <b>Reijnierse et al; 2015; The Netherlands<sup>65</sup></b> | Cross-sectional;<br>N = 185<br>None  | Community-dwelling, all subjects, mean age = 82 yrs                      | SNAQ Short-Appetite loss question                          | Relative muscle mass | <p>Association between loss of appetite and relative muscle mass as a standardized (Z) gender-specific diagnostic measure of sarcopenia (n = 123)</p> <p>Z lean mass percentage:<br/>Adjusted <math>\beta = -0.56</math>, SE = 0.17, <math>p = 0.001</math></p> <p>Z ALM percentage:<br/>Adjusted <math>\beta = -0.29</math>, SE = 0.19, <math>p = 0.130</math></p> <p>Both models adjusted for age and body mass</p>                                                                                                                                                                                                                                   |
|                                                             |                                      |                                                                          |                                                            | Absolute muscle mass | <p>Association between loss of appetite and absolute muscle mass as a standardized (Z) gender-specific diagnostic measure of sarcopenia (n = 123)</p> <p>Z total lean mass (kg):<br/><math>\beta = -0.54</math>, SE = 0.18, <math>p = 0.003</math></p>                                                                                                                                                                                                                                                                                                                                                                                                  |

|                                                     |                                      |                                                 |                 |                      |                                                                                                                                                                                                                                                                                           |
|-----------------------------------------------------|--------------------------------------|-------------------------------------------------|-----------------|----------------------|-------------------------------------------------------------------------------------------------------------------------------------------------------------------------------------------------------------------------------------------------------------------------------------------|
|                                                     |                                      |                                                 |                 |                      | Z ALM/height (kg/m <sup>2</sup> ):<br>β = -0.37, SE = 0.18, p = 0.036<br>Both models adjusted for age and fat mass                                                                                                                                                                        |
|                                                     |                                      |                                                 |                 | Muscle strength      | Association between loss of appetite and absolute muscle strength as a standardized (Z) gender-specific diagnostic measure of sarcopenia (n = 180)<br>Z hand-grip strength (kg):<br>β = -0.31, SE = 0.16, p = 0.051<br>Adjusted for age, body mass and height                             |
|                                                     |                                      |                                                 |                 | Physical performance | Association between loss of appetite and physical performance as a standardized (Z) gender-specific diagnostic measure of sarcopenia (n = 156)<br>Z walking speed (m/s):<br>β = -0.37, SE = 0.19, p = 0.052<br>Adjusted for age and height                                                |
| <b>Tsutsumimoto et al; 2020; Japan<sup>56</sup></b> | Cross-sectional;<br>N = 9496<br>None | Community-dwelling, all subjects, aged ≥65 yrs, | SNAQ Simplified | Risk of sarcopenia   | Multiple logistic regression analysis of association between anorexia of aging and sarcopenia<br>Adjusted OR (95% CI) = 1.42 (1.06, 1.92), p = 0.020<br>Adjusted for socio-demographic factors, medical conditions, lifestyle factors, neuropsychological factors, and nutritional status |

ALM, appendicular lean mass; BMI, body mass index; CI, confidence interval; COPD, chronic obstructive pulmonary disease; HR, hazard ratio; LMF, low masticatory function; OR, odds ratio; SD, standard deviation; SE, standard error; SNAQ Short, Short Nutritional Assessment Questionnaire; SNAQ Simplified, Simplified Nutritional Appetite Questionnaire; yrs, years.

**Table S7** Relationship between anorexia/appetite loss and functional status as reported in 6 identified studies

| Author;<br>year;<br>country                                                       | Study design;<br>sample size;<br>follow-up                                                                                  | Setting/cohort                                                                                                       | Anorexia/<br>appetite loss<br>assessment | Outcome measure                                                             | Outcome results<br>(association with anorexia or appetite loss)                                                                                                                                                                                                                                                                |
|-----------------------------------------------------------------------------------|-----------------------------------------------------------------------------------------------------------------------------|----------------------------------------------------------------------------------------------------------------------|------------------------------------------|-----------------------------------------------------------------------------|--------------------------------------------------------------------------------------------------------------------------------------------------------------------------------------------------------------------------------------------------------------------------------------------------------------------------------|
| <b>Longitudinal studies</b>                                                       |                                                                                                                             |                                                                                                                      |                                          |                                                                             |                                                                                                                                                                                                                                                                                                                                |
| <b>Kirkhus et al;</b><br><b>2019;</b><br><b>Norway</b> <sup>46</sup>              | Prospective<br>Longitudinal;<br>N = 288;<br>6 months                                                                        | Other (outpatients<br>with cancer aged ≥<br>70 yrs)                                                                  | EORTC QLQ-C30                            | Subject-reported<br>physical function                                       | Appetite loss (higher score is worse) and EORTC QLQ-C30 subject-reported physical function (higher score is better) at follow-up<br>Adj regression coefficient (95% CI) = -0.12 (-0.16, -0.09), p < 0.001<br>Adjusted for age, gender, ECOG PS, cancer type, disease stage, cancer treatment, and EORTC QLQ-C30 symptom scores |
| <b>van Grootven et al;</b><br><b>2020;</b><br><b>Belgium</b> <sup>45</sup>        | Prospective<br>Longitudinal;<br>N = 189;<br>Not reported, admission<br>date to discharge date                               | Inpatient<br>(hospitalized<br>subjects, aged ≥ 75<br>yrs)                                                            | Appetite question<br>(subject-reported)  | Hospitalization-<br>associated functional<br>decline (Katz Index of<br>ADL) | Loss of appetite and functional decline<br>Adjusted OR (95% CI): = 2.14 (1.08, 4.22) vs no appetite loss<br>Variables included in adjustment not reported                                                                                                                                                                      |
| <b>Mendelson et al;</b><br><b>2018;</b><br><b>Israel</b> <sup>44</sup>            | Retrospective<br>longitudinal;<br>N = 56;<br>Days between admission<br>and discharge, mean (SD)<br>FIM >70 = 21.3 (9.5) day | Inpatients with<br>osteoporotic hip<br>fracture and FIM ><br>70 at admission                                         | SNAQ Short-<br>appetite loss<br>question | FIM ≥ 90 at discharge                                                       | Subjects, n (%) with appetite loss as reported on the SNAQ (Short), by FIM category<br>at discharge:<br>FIM ≥90 = 15 (40.5) out of 37 subjects<br>FIM <90 (and >70) = 13 (68.4) out of 19 subjects, p = 0.048                                                                                                                  |
| <b>Nakatsu et al</b> <sup>a</sup> ;<br><b>2015;</b><br><b>Japan</b> <sup>66</sup> | Cross-sectional;<br>N = 84;<br>None                                                                                         | Community-<br>dwelling, aged ≥ 65<br>yrs                                                                             | SNAQ Simplified                          | Physical performance                                                        | Pearson correlations between SNAQ and physical performance measures<br>Walking speed test: r = 0.24, p < 0.05<br>Chair stand test: r = -0.25, p < 0.05<br>Hand-grip strength test: r = 0.19, p = 0.08<br>TUG: r = -0.28, p < 0.05                                                                                              |
| <b>Dent et al;</b><br><b>2015;</b><br><b>Australia</b> <sup>43</sup>              | Prospective<br>Longitudinal;<br>N = 172 (165 with<br>functional change data);<br>Until discharge or death                   | Inpatient, aged ≥ 70<br>yrs, admitted to<br>Geriatric Evaluation<br>and Management<br>Unit                           | SNAQ Simplified                          | Functional change<br>(Barthel Index)                                        | Change in functional status (between admission and discharge) and SNAQ<br>(Simplified) score<br>Adjusted regression coefficient (95% CI) = 0.44 (-0.30, 1.16), p = 0.237<br>Adjusted for age, gender, cognitive impairment, baseline function, Charlson's<br>Comorbidity Index, lives alone, depression, and inflammation      |
| <b>Cross-sectional studies</b>                                                    |                                                                                                                             |                                                                                                                      |                                          |                                                                             |                                                                                                                                                                                                                                                                                                                                |
| <b>Donini et al;</b><br><b>2011;</b><br><b>Italy</b> <sup>61</sup>                | Cross-sectional;<br>N = 527;<br>None                                                                                        | Other (mixed<br>community, nursing<br>home,<br>rehabilitation care,<br>acute care) all<br>subjects, aged ≥ 65<br>yrs | Food consumption<br>(staff-assessed)     | Functional status<br>(IADL score)                                           | Mean (SD) functional status as measured by IADL score:<br>With anorexia = 4.2 (5.0)<br>Without anorexia = 7.9 (6.0), p < 0.05                                                                                                                                                                                                  |

<sup>a</sup> Authors measured walking speed, chair stand time, hand-grip strength, and TUG test, and characterized these outcomes as measures of physical performance and not sarcopenia; however, other studies also used these measures to assess sarcopenia.

ADL, activities of daily living; CI, confidence interval; ECOG PS, Eastern Cooperative Oncology Group performance status; EORTC QLQ-C30, European Organization for the Research and Treatment of Cancer Quality of Life Questionnaire; FIM, Functional Independence Measure; IADL, Instrumental Activities of Daily Living; OR, odds ratio; SD, standard deviation; SNAQ Short, Short Nutritional Assessment Questionnaire; SNAQ Simplified, Simplified Nutritional Appetite Questionnaire; TUG, timed up and go; yrs, years.

**Table S8** Relationship between anorexia/appetite loss and increased care as reported in 6 identified studies

| Author;<br>year;<br>country                           | Study design;<br>sample size;<br>follow-up           | Setting/cohort                                                                                                                 | Anorexia/<br>appetite loss<br>assessment | Outcome measure                                        | Outcome results<br>(association with anorexia or appetite loss)                                                                                                                                                                                                                                                                                                                                            |
|-------------------------------------------------------|------------------------------------------------------|--------------------------------------------------------------------------------------------------------------------------------|------------------------------------------|--------------------------------------------------------|------------------------------------------------------------------------------------------------------------------------------------------------------------------------------------------------------------------------------------------------------------------------------------------------------------------------------------------------------------------------------------------------------------|
| <b>Longitudinal studies</b>                           |                                                      |                                                                                                                                |                                          |                                                        |                                                                                                                                                                                                                                                                                                                                                                                                            |
| Sheppard et al;<br>2013;<br>US <sup>40</sup>          | Prospective<br>longitudinal;<br>N = 999;<br>8.5 yrs  | Community-dwelling,<br>aged ≥ 65 yrs                                                                                           | PROMIS                                   | Nursing home                                           | N (%) with poor appetite:<br>With nursing home admission within 8.5 yrs = 22 (29.3)<br>Without nursing home admission within 8.5 yrs = 150 (16.2), p = 0.004<br>Symptom burden score (includes appetite) as a factor predicting time to nursing home admission (n = 75):<br>Adjusted HR (95% CI) = 1.10 (1.00, 1.20), p = 0.051<br>Adjusted for number of comorbidities, race, sex, and age                |
| Hsu et al;<br>2018;<br>Taiwan <sup>38</sup>           | Retrospective<br>longitudinal;<br>N = 1986<br>4 yrs; | Community-dwelling,<br>aged ≥ 70 yrs                                                                                           | CES-D                                    | Receipt of formal or<br>informal long-term care        | Poor appetite and receipt of increased care (n = 1883)<br>Adjusted OR (95% CI) = 1.42 (1.05, 1.90), p = 0.021<br>Adjusted for age, sex, education, self-rated health, calf circumference, number of comorbidities, multi-medication, vision/hearing difficulties, emergency department use, living arrangement, social supports, economic status, plus 7 functional status items and 9 mental-health items |
| Salminen et al;<br>2018;<br>Finland <sup>39</sup>     | Prospective<br>longitudinal;<br>N = 1032;<br>22 yrs  | Community-dwelling,<br>1920 birth cohort,<br>aged ≥ 70 yrs,<br>assessed in 1991                                                | Appetite question<br>(subject-reported)  | Entry to nursing home or<br>sheltered housing          | Loss of appetite as a predictive factor for institutionalization (n = 698)<br>Adjusted regression coefficient (SE) = -0.002 (0.29), p = 0.995<br>Assumed adjusted for socio-demographic factors, health, psychosocial and physical status, need for help, and health behavior                                                                                                                              |
| Pilgrim et al;<br>2016;<br>UK (England) <sup>26</sup> | Prospective<br>longitudinal;<br>N = 178;<br>6 months | Inpatient, "Elderly"<br>women, hospitalized<br>in geriatric ward                                                               | SNAQ Simplified                          | Moved into a rest or<br>nursing home by follow-<br>up  | Move to a rest/nursing home and association with poor appetite (SNAQ Simplified < 14)<br>Adjusted OR (95% CI) = 0.87 (0.27, 2.80), p = 0.821<br>Adjusted for length of stay, time from discharge to follow-up and number of comorbidities                                                                                                                                                                  |
| Dent et al;<br>2015;<br>Australia <sup>43</sup>       | Prospective<br>longitudinal;<br>N = 172              | Inpatient, aged ≥ 70<br>yrs, admitted to<br>Geriatric Evaluation<br>and Management<br>Unit                                     | SNAQ Simplified                          | Discharged to higher level<br>of care (includes death) | Discharge to higher-level care and SNAQ Simplified score<br>Adjusted OR (95% CI) = 0.98 (0.89, 1.08), p = 0.641<br>Adjusted for age, gender, cognitive impairment, baseline function, Charlson's Comorbidity Index, and lives alone                                                                                                                                                                        |
| <b>Cross-sectional</b>                                |                                                      |                                                                                                                                |                                          |                                                        |                                                                                                                                                                                                                                                                                                                                                                                                            |
| Donini et al;<br>2011;<br>Italy <sup>61</sup>         | Cross-sectional;<br>N = 527;<br>None                 | Other (mixed<br>community-dwelling,<br>nursing home,<br>rehabilitation care,<br>acute care), all<br>subjects, aged ≥ 65<br>yrs | Food consumption<br>(staff-assessed)     | Residential<br>accommodation type                      | Percentage of pts with anorexia, by gender and accommodation type<br>Rehabilitation/acute geriatric ward:<br>Male = 26.7%<br>Female = 33.3%<br>Nursing home:<br>Male = 27.2%<br>Female = 34.1%<br>Free living:<br>Male = 11.3%,<br>Female = 3.38%, p < 0.05 vs other settings (for each sex)                                                                                                               |

CES -D, Center for Epidemiologic Studies Depression Scale; CI, confidence interval; HR, hazard ratio; OR, odds ratio; PROMIS, Patient-Reported Outcomes Measurement Information System; SE, standard error; SNAQ Simplified, Simplified Nutritional Appetite Questionnaire; yrs, years.

**Table S9** Relationship between anorexia/appetite loss and hospitalization as reported in 4 identified studies

| Author; year; country                                  | Study design; sample size; follow-up        | Setting/cohort                                                                                 | Anorexia/appetite loss assessment    | Outcome measure                                                                   | Outcome results (association with anorexia or appetite loss)                                                                                                                                                                                                                                                                                                        |
|--------------------------------------------------------|---------------------------------------------|------------------------------------------------------------------------------------------------|--------------------------------------|-----------------------------------------------------------------------------------|---------------------------------------------------------------------------------------------------------------------------------------------------------------------------------------------------------------------------------------------------------------------------------------------------------------------------------------------------------------------|
| <b>Longitudinal studies</b>                            |                                             |                                                                                                |                                      |                                                                                   |                                                                                                                                                                                                                                                                                                                                                                     |
| <b>Salanitro et al; 2012; US</b> <sup>41</sup>         | Prospective longitudinal; N = 980; 8.5 yrs  | Community-dwelling, aged ≥ 65 yrs, Medicare beneficiaries                                      | Appetite question (subject-reported) | Hospital utilization: time to first hospitalization or emergency department visit | Poor appetite as a component of symptom burden and association with time to first hospital utilization or emergency department visit<br>HR (95% CI) = 1.09 (1.04, 1.14), p < 0.001. P-value for poor appetite alone, p = 0.417<br>Adjusted for age, race, gender, comorbidity count, location of residence, availability of friends/family, BMI, and smoking status |
|                                                        |                                             |                                                                                                |                                      | Time to first hospital admission                                                  | Poor appetite as a component of symptom burden and association with time to first hospital admission<br>HR (95% CI) = 1.08 (1.04, 1.13), p < 0.001. P-value for poor appetite alone, p = 0.529<br>Adjusted for age, race, gender, comorbidity count, location of residence, availability of friends/family, BMI, and smoking status                                 |
| <b>Pilgrim et al; 2016; UK (England)</b> <sup>26</sup> | Prospective longitudinal; N = 178; 6 months | Inpatient, "Elderly" women, hospitalized in geriatric ward                                     | SNAQ Simplified                      | Hospital LOS                                                                      | Hospitalization length of stay and association with poor appetite (SNAQ Simplified < 14)<br>Adjusted regression coefficient (95% CI) = 0.26 (-0.03, 0.54), p = 0.075<br>Adjusted for number of comorbidities                                                                                                                                                        |
|                                                        |                                             |                                                                                                |                                      | Readmission (re-admitted to hospital by time of follow-up)                        | Readmission and association with poor appetite (SNAQ Simplified < 14)<br>Adjusted HR (95% CI) = 0.99 (0.63, 1.56), p = 0.966<br>Adjusted for LOS and number of comorbidities                                                                                                                                                                                        |
| <b>Dent et al; 2015; Australia</b> <sup>43</sup>       | Prospective longitudinal; N = 172           | Inpatients, aged ≥ 70 yrs, admitted to Geriatric Evaluation and Management Unit                | SNAQ Simplified                      | Hospital LOS                                                                      | Hospital LOS and SNAQ Simplified (n = 165 with data)<br>Adjusted regression coefficient (95% CI) = 0.004 (-0.010, 0.001), p = 0.590<br>Adjusted for age, gender, cognitive impairment risk, baseline function, Charlson's Comorbidity Index, lives alone, depression, and inflammation                                                                              |
| <b>Taniguchi et al; 2019; Japan</b> <sup>28</sup>      | Retrospective Longitudinal; N = 139; 2 yrs  | Inpatient followed by community or institution upon discharge, all subjects who underwent TAVI | Food consumption (staff-assessed)    | Hospitalization of acute decompensated heart failure                              | Hospitalization, all subjects:<br>1-yr, n (%) = 7 (5.0)<br>2-yr, n (%) = 8 (5.8)<br>Hospitalization, good appetite vs less appetite, n (%):<br>1-yr: 2 (1.9) vs 5 (14.7), p = 0.01<br>2-yr: 2 (1.9) vs 6 (17.6), p < 0.01                                                                                                                                           |

BMI, body mass index; CI, confidence interval; HR, hazard ratio; LOS, length of stay; SNAQ Simplified, Simplified Nutritional Appetite Questionnaire; TAVI, transcatheter aortic valve implantation; yrs, years.

**Table S10** Relationship between anorexia/appetite loss and falls as reported in 3 identified studies

| Author;<br>year;<br>country                                 | Study design;<br>sample size;<br>follow-up                                                         | Setting/cohort                                                                                                         | Anorexia/<br>appetite loss<br>assessment | Outcome measure                          | Outcome results<br>(association with anorexia or appetite loss)                                                                                                                                                                                                                                                               |
|-------------------------------------------------------------|----------------------------------------------------------------------------------------------------|------------------------------------------------------------------------------------------------------------------------|------------------------------------------|------------------------------------------|-------------------------------------------------------------------------------------------------------------------------------------------------------------------------------------------------------------------------------------------------------------------------------------------------------------------------------|
| <b>Cross-sectional</b>                                      |                                                                                                    |                                                                                                                        |                                          |                                          |                                                                                                                                                                                                                                                                                                                               |
| <b>Arkkukangas et al;<br/>2020;<br/>Sweden<sup>55</sup></b> | Cross-sectional;<br>N = 13,151 respondents<br>(3385 women with fall<br>and appetite data);<br>None | Mixed<br>(community-<br>dwelling and<br>nursing home),<br>Women aged ≥<br>70 yrs with data<br>on falls and<br>appetite | Appetite question<br>(subject-reported)  | Fall-related injury in last<br>12 months | Odds of fall-related injury and poor appetite in women<br>Adjusted OR (95% CI) = 1.81 (1.30, 2.51), p = 0.000<br>Data for men not reported                                                                                                                                                                                    |
| <b>Fonad et al;<br/>2015;<br/>Sweden<sup>62</sup></b>       | Cross-sectional;<br>N = 1193<br>None                                                               | Community-<br>dwelling, aged ≥<br>75 yrs                                                                               | Appetite question<br>(subject-reported)  | Falls in past 12 months                  | Appetite loss during the previous 6 months and odds of self-reported fall in past 12<br>months<br>Adjusted OR (95% CI) = 1.06 (0.65, 1.70), p = 0.827; variables included in adjustment<br>not reported<br>Unadjusted OR (95% CI) = 2.22 (1.61, 3.05), p-value not reported                                                   |
| <b>Kim et al;<br/>2019;<br/>Japan<sup>60</sup></b>          | Cross-sectional<br>N = 265;<br>None                                                                | Community-<br>dwelling, aged ><br>70 yrs                                                                               | CNAQ                                     | Cognitive frailty-related<br>falls       | Association between appetite (per 1 point on the CNAQ) and falls related to cognitive<br>frailty (defined as MMSE score between 19 and 26 and physical frailty)<br>Adjusted OR (95% CI) = 0.70 (0.57, 0.87), p < 0.05<br>Adjusted for age, gender, chronic conditions, calf circumference, physical function,<br>and dementia |

CI, confidence interval; CNAQ, Council on Nutrition Appetite Questionnaire; MMSE, Mini-Mental State Exam; OR, odds ratio; yrs, years.

**Table S11** Relationship between anorexia/appetite loss and health-related quality of life as reported in 3 identified studies

| Author; year; country                                          | Study design; sample size; follow-up        | Setting/cohort                                                      | Anorexia/appetite loss assessment | Outcome measure          | Outcome results (association with anorexia or appetite loss)                                                                                                                                                                                                                                                  |
|----------------------------------------------------------------|---------------------------------------------|---------------------------------------------------------------------|-----------------------------------|--------------------------|---------------------------------------------------------------------------------------------------------------------------------------------------------------------------------------------------------------------------------------------------------------------------------------------------------------|
| <b>Longitudinal</b>                                            |                                             |                                                                     |                                   |                          |                                                                                                                                                                                                                                                                                                               |
| Kirkhus et al; 2019; Norway <sup>46</sup>                      | Prospective longitudinal; N = 288; 6 months | Other (outpatient) all subjects, aged ≥ 70 yrs with cancer          | EORTC QLQ-C30                     | Global QoL               | Association between appetite loss (higher score is worse) and global QoL (higher score is better) at follow-up<br>Adjusted regression coefficient (95% CI) = -0.16 (-0.20, -0.12), p < 0.001<br>Adjusted for age, gender, ECOG PS, cancer type, disease stage, treatment, and symptom scores                  |
| <b>Cross-sectional</b>                                         |                                             |                                                                     |                                   |                          |                                                                                                                                                                                                                                                                                                               |
| Pisu et al; 2018; US <sup>58</sup>                             | Cross-sectional; N = 537; None              | Community-dwelling, aged ≥ 65 yrs, with cancer; validation data set | MDASI                             | SF-12 Physical Component | Lack of appetite and association with SF-12 Physical Component score, proportion of variance explained<br>Adjusted R <sup>2</sup> (95% CI) = 0.08 (0.04, 0.14)<br>Factors were considered to be strongly associated with HRQoL if adjusted R <sup>2</sup> ≥ 0.13<br>Covariates adjusted for were not reported |
|                                                                |                                             |                                                                     |                                   | SF-12 Mental Component   | Lack of appetite and association with SF-12 Mental Component score, proportion of variance explained<br>Adjusted R <sup>2</sup> (95% CI) = 0.16 (0.11, 0.25)<br>Factors were considered to be strongly associated with HRQoL if adjusted R <sup>2</sup> ≥ 0.13<br>Covariates adjusted for were not reported   |
| Acar Tek and Karaçil-Ermumcu et al; 2018; Turkey <sup>63</sup> | Cross-sectional; N = 407; None              | Community-dwelling, mean (SD) age = 71.7 (6.54) yrs                 | SNAQ Simplified                   | SF-36 Physical Component | Association between SNAQ Simplified and SF-36 Physical Component score:<br>Correlation: r = 0.46, p = 0.000<br>Adjusted regression coefficient B = 2.21, β = 0.32, SE = 0.37, p = 0.000<br>Adjusted for years of education, number of medications, BMI, MNA-SF                                                |
|                                                                |                                             |                                                                     |                                   | SF-36 Mental Component   | Association between SNAQ (Simplified) and SF-36 Mental Component score:<br>Correlation: r = 0.40, p = 0.000.<br>Adjusted regression coefficient: B = 1.48, β = 0.24, SE = 0.31, p = 0.000<br>Adjusted for number of medications and MNA-SF                                                                    |

BMI, body mass index; CI, confidence interval; ECOG PS, Eastern Cooperative Oncology Group performance status; EORTC QLQ-C30, European Organization for the Research and Treatment of Cancer Quality of Life Questionnaire; HRQoL, health-related quality of life; MDASI, MD Anderson Symptom Inventory; MNA-SF, Mini Nutritional Assessment-Short Form; QoL, quality of life; SD, standard deviation; SE, standard error; SF, Short Form; SNAQ Simplified, Simplified Nutritional Appetite Questionnaire; yrs, years.

**Table S12** Relationship between anorexia/appetite loss and cognition, depression, or disability as reported in 5 identified studies

| Author;<br>year;<br>country                                  | Study design;<br>sample size;<br>follow-up                                    | Setting/cohort                                                                                                            | Anorexia/<br>appetite loss<br>assessment | Outcome measure                                        | Outcome results<br>(association with anorexia or appetite loss)                                                                                                                                                                                                                                                                                            |
|--------------------------------------------------------------|-------------------------------------------------------------------------------|---------------------------------------------------------------------------------------------------------------------------|------------------------------------------|--------------------------------------------------------|------------------------------------------------------------------------------------------------------------------------------------------------------------------------------------------------------------------------------------------------------------------------------------------------------------------------------------------------------------|
| <b>Cognition</b>                                             |                                                                               |                                                                                                                           |                                          |                                                        |                                                                                                                                                                                                                                                                                                                                                            |
| <b>Donini et al;<br/>2011;<br/>Italy<sup>61</sup></b>        | Cross-sectional;<br>N = 527;<br>None                                          | Other (mixed<br>community-dwelling,<br>nursing home,<br>rehabilitation care,<br>acute care) all subjects,<br>aged ≥65 yrs | Food consumption<br>(staff-assessed)     | Cognition status                                       | Association of anorexia with cognitive status as measured by mean (SD) MMSE score:<br>With anorexia = 18.5 (9.0)<br>Without anorexia = 23.8 (5.0), p < 0.05                                                                                                                                                                                                |
| <b>Kim et al;<br/>2019;<br/>Japan<sup>60</sup></b>           | Cross-sectional;<br>N = 265;<br>None                                          | Community-dwelling,<br>aged > 70 yrs,                                                                                     | CNAQ                                     | Risk of cognitive frailty                              | Association between appetite (per 1 point on the CNAQ) and cognitive frailty<br>(defined as MMSE score between 19 and 26 and physically frailty)<br>Adjusted OR (95% CI) = 0.74 (0.63, 0.86), p= 0.001<br>Adjusted for age, gender, chronic conditions, calf circumference, physical function,<br>and dementia                                             |
| <b>Depression</b>                                            |                                                                               |                                                                                                                           |                                          |                                                        |                                                                                                                                                                                                                                                                                                                                                            |
| <b>Donini et al;<br/>2011;<br/>Italy<sup>61</sup></b>        | Cross-sectional;<br>N = 527;<br>None                                          | Other (mixed<br>community-dwelling,<br>nursing home,<br>rehabilitation care,<br>acute care) all subjects,<br>aged ≥65 yrs | Food consumption<br>(staff-assessed)     | Depression score                                       | Mean (SD) Geriatric Depression Scale score:<br>With anorexia = 6.7 (5.0)<br>Without anorexia = 4.7 (4.0), p < 0.05<br>Mean (SD) Cornell depression score:<br>With anorexia = 12.1 (7.0)<br>Without anorexia = 8.7 (7.0), p < 0.05                                                                                                                          |
| <b>Nakatsu et al;<br/>2015;<br/>Japan<sup>66</sup></b>       | Cross-sectional;<br>N = 84;<br>None                                           | Community-dwelling,<br>aged ≥ 65 yrs                                                                                      | SNAQ Simplified                          | Depression score                                       | Pearson correlation between SNAQ Simplified and depression score<br>Geriatric depression score: r = -0.43, p < 0.001                                                                                                                                                                                                                                       |
| <b>Disability</b>                                            |                                                                               |                                                                                                                           |                                          |                                                        |                                                                                                                                                                                                                                                                                                                                                            |
| <b>Martinez-Reig et al;<br/>2014;<br/>Spain<sup>37</sup></b> | Prospective<br>longitudinal;<br>N = 600;<br>18 months after<br>baseline visit | Community-dwelling, all<br>subjects aged ≥ 70 yrs                                                                         | MNA-SF Q1 (food<br>intake question)      | Incident disability in BADL                            | Association between anorexia and incident disability in BADL<br>Adjusted OR (95% CI) = 1.65 (0.94, 2.87)<br>Adjusted for age, sex, previous disability in BADL, comorbidity burden, depression<br>risk, cognitive impairment, and frailty status                                                                                                           |
| <b>Tsutsumimoto et al;<br/>2018;<br/>Japan<sup>7</sup></b>   | Prospective<br>longitudinal;<br>N = 4393;<br>2 years                          | Community-dwelling, all<br>subjects aged ≥ 70 yrs                                                                         | SNAQ Simplified                          | Disability requiring<br>escalated care within 2<br>yrs | Disability occurred in 270 (6.1%) subjects:<br>With anorexia = 10.7%<br>Without anorexia = 5.6%, p < 0.001<br>Adjusted HR (95% CI) = 1.43 (1.04, 1.95), p = 0.026. Adjusted for covariates excluding<br>frailty status<br>Adjusted HR (95% CI) = 1.33 (0.96, 1.80), p = 0.093. Adjusted for covariates including<br>frailty status (no longer significant) |

BADL, basic activities of daily living; CNAQ, Council on Nutrition Appetite Questionnaire; CI, confidence interval; HR, hazard ratio; MMSE, Mini-Mental State Exam; MNA-SF, Mini Nutritional Assessment-Short Form; OR, odds ratio; SD, standard deviation; SNAQ Simplified, Simplified Nutritional Appetite Questionnaire; yrs, years.



**Table S13** Relationship between anorexia/appetite loss and other outcomes as reported in 6 identified studies

| Author; year; country                                  | Study design; sample size; follow-up                           | Setting/cohort                                                                                 | Anorexia/appetite loss assessment | Outcome measure                                   | Outcome results (association with anorexia or appetite loss)                                                                                                                                                                                                                                                |
|--------------------------------------------------------|----------------------------------------------------------------|------------------------------------------------------------------------------------------------|-----------------------------------|---------------------------------------------------|-------------------------------------------------------------------------------------------------------------------------------------------------------------------------------------------------------------------------------------------------------------------------------------------------------------|
| <b>Longitudinal studies</b>                            |                                                                |                                                                                                |                                   |                                                   |                                                                                                                                                                                                                                                                                                             |
| <b>Pilgrim et al; 2016; UK (England)</b> <sup>26</sup> | Prospective longitudinal; N = 178; 6 months                    | Inpatient, all “elderly” women, hospitalized in geriatric wards                                | SNAQ Simplified                   | Weight loss > 5% (at 6-month follow-up)           | Weight loss > 5% and association with poor appetite (SNAQ Simplified < 14)<br>Adjusted OR (95% CI) = 1.11 (0.47, 2.63), p = 0.805<br>Adjusted for length of stay and number of comorbidities                                                                                                                |
|                                                        |                                                                |                                                                                                |                                   | Hospital-acquired infection                       | Hospital-acquired infection and association with poor appetite (SNAQ Simplified < 14)<br>Adjusted OR (95% CI) = 3.53 (1.48, 8.41), p = 0.004<br>Adjusted for length of stay and number of comorbidities                                                                                                     |
|                                                        |                                                                |                                                                                                |                                   | MACCE (at 1 and 2 yrs)                            | MACCE at 2 yrs, adjusted HR (95% CI) = 5.26 (1.66, 16.71), p < 0.01<br>All subjects:<br>1 yr, n (%) = 11 (7.9)<br>2 yrs, n (%) = 14 (10.1)<br>Good appetite:<br>1 yr, n (%) = 5 (4.8);<br>2 yrs, n (%) = 6 (5.7)<br>Less appetite:<br>1 yr, n (%) = 6 (17.6), p = 0.03<br>2 yrs, n (%) = 8 (23.5), p < 0.01 |
| <b>Taniguchi et al; 2019; Japan</b> <sup>28</sup>      | Retrospective longitudinal; N = 139; 2 years                   | Inpatient followed by community or institution upon discharge, all subjects who underwent TAVI | Food consumption (staff-assessed) | Life-threatening stroke (at 1 and 2 yrs)          | Life-threatening stroke<br>All subjects:<br>1 yr, n (%) = 2 (1.4)<br>2 yrs, n (%) = 6 (4.8)<br>Good appetite:<br>1 yr, n (%) = 2 (1.9)<br>2 yrs, n (%) = 4 (4.5)<br>Less appetite:<br>1 yr, n (%) = 0 (0), p = 0.57<br>2 yrs, n (%) = 2 (5.7), p = 0.55                                                     |
|                                                        |                                                                |                                                                                                |                                   |                                                   |                                                                                                                                                                                                                                                                                                             |
| <b>Won et al; 2019; Korea</b> <sup>47</sup>            | Prospective longitudinal; N = 75; Until death or December 2015 | Other (outpatient), all subjects                                                               | EORTC QLQ-C30                     | Treatment interruption (stopped cancer treatment) | Low score on appetite loss symptom scale:<br>Unadjusted OR = 0.99 (95% CI = 0.98, 1.00), p = 0.03; not significant in multivariate analysis<br>Mean (SD) appetite loss score:<br>Treatment continuation group = 29.4 (40.0)<br>Treatment interruption group = 52.0 (45.9), p = 0.028                        |
| <b>Cross-sectional studies</b>                         |                                                                |                                                                                                |                                   |                                                   |                                                                                                                                                                                                                                                                                                             |
| <b>Donini et al; 2011; Italy</b> <sup>61</sup>         | Cross-sectional; N = 527; None                                 | Other (mixed community-dwelling, nursing home, rehabilitation)                                 | Food consumption (staff assessed) | General health (comorbidity burden)               | Anorexia and comorbidity as assessed by the Cumulative Illness Rating Scale, mean (SD)<br>With anorexia = 2.4 (2.0)<br>Without anorexia = 2.1 (2.0), p < 0.05                                                                                                                                               |

|                                                            |                                                |                                                                                                                |                        |                                                 |                                                                                                                                                                                                                                                                                                                                                                                                                                                                                                                                                                                                                                 |
|------------------------------------------------------------|------------------------------------------------|----------------------------------------------------------------------------------------------------------------|------------------------|-------------------------------------------------|---------------------------------------------------------------------------------------------------------------------------------------------------------------------------------------------------------------------------------------------------------------------------------------------------------------------------------------------------------------------------------------------------------------------------------------------------------------------------------------------------------------------------------------------------------------------------------------------------------------------------------|
| <p><b>Yamamoto et al; 2020; Japan<sup>59</sup></b></p>     | <p>Cross-sectional;<br/>N = 1042;<br/>None</p> | <p>care, acute care),<br/>all subjects, aged<br/>≥ 65 yrs</p> <p>Community-<br/>dwelling, all<br/>subjects</p> | <p>CNAQ</p>            | <p>Sleep quality<br/>(low sleep efficiency)</p> | <p>CNAQ tertile and low sleep efficiency<br/>Middle (better) CNAQ vs low (worst) CNAQ:<br/>Adjusted OR (95% CI) = 0.73 (0.47, 1.14)<br/>High (best) CNAQ vs low CNAQ:<br/>Adjusted OR (95% CI) = 0.54 (0.30, 0.96)<br/>p for trend = 0.031<br/>Adjusted for sex, age, BMI, alcohol consumption, smoking, exercise, diabetes, residential status, depression, and midpoint of sleep timing<br/>Association of anorexia (SNAQ Simplified &lt; 14) with pre-frailty status vs non-frailty<br/>Adjusted OR (95% CI) = 1.59 (1.25, 2.02), p = 0.001 vs SNAQ ≥ 14<br/>Adjusted for covariates including blood protein and albumin</p> |
| <p><b>Tsutsumimoto et al; 2017; Japan<sup>57</sup></b></p> | <p>Cross-sectional;<br/>N = 4417;<br/>None</p> | <p>Community-<br/>dwelling, all<br/>subjects, aged ≥<br/>70 yrs</p>                                            | <p>SNAQ Simplified</p> | <p>Frailty<br/>(pre-frailty status)</p>         | <p>Association of anorexia (SNAQ Simplified &lt; 14) with pre-frailty status vs non-frailty<br/>Adjusted OR (95% CI) = 1.59 (1.25, 2.02), p = 0.001 vs SNAQ ≥ 14<br/>Adjusted for covariates including blood protein and albumin</p>                                                                                                                                                                                                                                                                                                                                                                                            |
|                                                            |                                                |                                                                                                                |                        | <p>Frailty<br/>(frailty status)</p>             | <p>Association of anorexia (SNAQ Simplified &lt; 14) with frailty status vs non-frailty<br/>Adjusted OR (95% CI) = 1.86 (1.39, 2.49), p = 0.001 vs SNAQ ≥ 14<br/>Adjusted for covariates including blood protein and albumin</p>                                                                                                                                                                                                                                                                                                                                                                                                |
|                                                            |                                                |                                                                                                                |                        | <p>Frailty<br/>(slowness)</p>                   | <p>Association of anorexia (SNAQ Simplified &lt; 14) with slowness as a component of frailty<br/>Adjusted OR (95% CI) = 1.42 (1.14, 1.75), p = 0.002<br/>Adjusted for covariates including blood protein and albumin</p>                                                                                                                                                                                                                                                                                                                                                                                                        |
|                                                            |                                                |                                                                                                                |                        | <p>Frailty<br/>(exhaustion)</p>                 | <p>Association of anorexia (SNAQ Simplified &lt; 14) with the exhaustion as a component of frailty<br/>Adjusted OR (95% CI) = 1.39 (1.11, 1.74), p = 0.004<br/>Adjusted for covariates including blood protein and albumin</p>                                                                                                                                                                                                                                                                                                                                                                                                  |
|                                                            |                                                |                                                                                                                |                        | <p>Frailty<br/>(weight loss)</p>                | <p>Association of anorexia (SNAQ Simplified &lt; 14) with weight loss as a component of frailty<br/>Adjusted OR (95% CI) = 1.37 (1.05, 1.79), p = 0.019<br/>Adjusted for covariates including blood protein and albumin</p>                                                                                                                                                                                                                                                                                                                                                                                                     |
|                                                            |                                                |                                                                                                                |                        | <p>Frailty<br/>(weakness via grip strength)</p> | <p>Association of anorexia (SNAQ Simplified &lt; 14) with weakness as a component of frailty<br/>Adjusted OR (95% CI) = 1.06 (0.81, 1.38), p = 0.692<br/>Adjusted for covariates including blood protein and albumin</p>                                                                                                                                                                                                                                                                                                                                                                                                        |
|                                                            |                                                |                                                                                                                |                        | <p>Frailty<br/>(low physical activity)</p>      | <p>Association of anorexia (SNAQ Simplified &lt; 14) with low physical activity as a component of frailty<br/>Adjusted OR (95% CI) = 1.14 (0.90, 1.45), p = 0.267<br/>Adjusted for covariates including blood protein and albumin</p>                                                                                                                                                                                                                                                                                                                                                                                           |

BMI, body mass index; CI, confidence interval; CNAQ, Council on Nutrition Appetite Questionnaire; EORTC QLQ-C30, European Organization for the Research and Treatment of Cancer Quality of Life Questionnaire; MACCE, major adverse cardiovascular or cerebrovascular events; OR, odds ratio; SD, standard deviation; SNAQ Simplified, Simplified Nutritional Appetite Questionnaire; TAVI, transcatheter aortic valve implantation.

**Figure S1** Summary of association between anorexia/appetite loss and scale used to assess appetite in studies identified (n = 58)

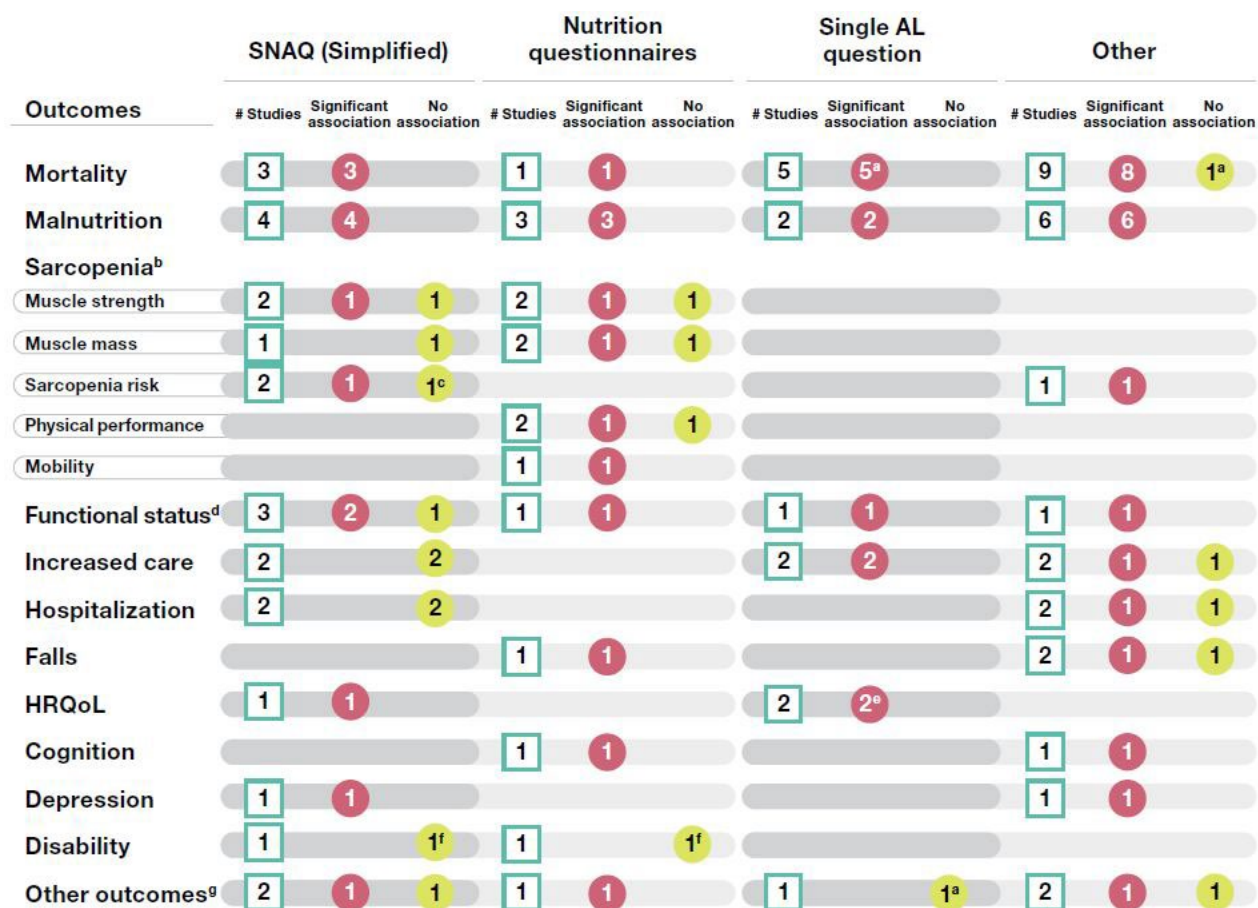

<sup>a</sup> Based on findings from the univariate analyses, a significant association was found between anorexia/appetite loss and mortality in Hofer et al., 2018 but not in Kanamori et al., 2012. A significant association was found between anorexia/appetite loss and treatment interruption in univariate, but not multivariate analysis in Won et al., 2019.

<sup>b</sup> Sarcopenia was assessed in 7 studies.

<sup>c</sup> Poor appetite alone was not significantly associated with sarcopenia development in participants with poor appetite and without low masticatory function; however, a significantly higher risk of sarcopenia was observed in those who had both poor appetite and low masticatory function (Senoo et al., 2020).

<sup>d</sup> In Nakatsu et al., 2015, the authors measured walking speed, chair stand time, hand-grip strength, and timed "Up and Go" test, and characterized these outcomes as measures of physical performance and not sarcopenia; however, other studies also used these measures to assess sarcopenia. A significant correlation between walking speed, chair stand time, and timed "Up and Go" test and better appetite was noted, whereas the correlation between hand-grip strength and appetite was not statistically significant.

<sup>e</sup> Lack of appetite was found to be associated with HRQoL as assessed by the SF-12 MCS score only, but not with the SF-12 PCS score (Pisu et al., 2018).

<sup>f</sup> Anorexia was found to be associated with a significantly higher risk of disability in both studies in unadjusted or non-fully adjusted models, but this association was no longer significant in fully adjusted models (Martinez-Reig et al., 2014; Tsutsumimoto et al., 2018).

<sup>g</sup> “Other outcomes” includes frailty, general health, infection, MACCE, sleep quality, stroke, treatment (chemotherapy) interruption, and weight loss, which are reported in one study each. AL, appetite loss; HRQoL, health-related quality of life; SNAQ Simplified, Simplified Nutritional Appetite Questionnaire.
